# Supplementary material for: Maternal milk microbiota and oligosaccharides contribute to the infant gut microbiota assembly
Source: PubMed Central journal article supplement (PMC9723702; doi:10.1038/s43705-021-00021-3), 2021-06-07
Supplement: 43705_2021_21_MOESM2_ESM.pdf [file 43705_2021_21_MOESM2_ESM.pdf]

**Table S1 - SKOT III cohort characteristics and data**

| <b>Parameter<sup>1</sup></b>                                            | <b>SKOT III (n=34)</b> |
|-------------------------------------------------------------------------|------------------------|
| <b>Cohort metadata</b>                                                  |                        |
| <i>Maternal age at birth (years, average ± sd)<sup>a</sup></i>          | 32.56 ± 3.77           |
| <i>Gestational age at birth (weeks, average ± sd)<sup>c</sup></i>       | 40.42 ± 1.06           |
| <i>Age (months, average ± sd)</i>                                       |                        |
| 1st visit                                                               | 5.81 ± 0.40            |
| 2nd visit <sup>e</sup>                                                  | 9.03 ± 0.25            |
| <i>Gender</i>                                                           |                        |
| Males                                                                   | 17/34 (50.0 %)         |
| Females                                                                 | 17/34 (50.0 %)         |
| <i>Mode of birth<sup>f</sup></i>                                        |                        |
| Vaginal                                                                 | 23/29 (79.3 %)         |
| C-section                                                               | 6/29 (21.7 %)          |
| <i>Excessive weight gain during exclusive breastfeeding<sup>2</sup></i> |                        |
| Yes                                                                     | 13/34 (38.2 %)         |
| No                                                                      | 17/34 (61.8 %)         |
| <i>Breastfeeding</i>                                                    |                        |
| At 1st visit                                                            | 34/34 (100 %)          |
| At 2nd visit <sup>e</sup>                                               | 31/33 (93.9 %)         |
| <i>Siblings<sup>a</sup></i>                                             |                        |
| No Siblings                                                             | 17/33 (51.5 %)         |
| 1 sibling                                                               | 12/33 (36.4 %)         |
| 2 siblings                                                              | 4/33 (12.1 %)          |
| <i>Maternal antibiotics</i>                                             |                        |
| At 1st visit                                                            | 1/34 (2.9 %)           |
| At 2nd visit <sup>e</sup>                                               | 0/33 (0.0 %)           |
| <i>Infant antibiotics</i>                                               |                        |
| At 1st visit                                                            | 0/34 (0.0 %)           |
| At 2nd visit <sup>e</sup>                                               | 1/33 (3.0 %)           |
| <i>Maternal secretor status<sup>b</sup></i>                             |                        |
| Secretor                                                                | 27/32 (85.4 %)         |
| Non-secretor                                                            | 5/32 (14.6 %)          |
| <b>Samples with microbiome data</b>                                     |                        |
| <i>Maternal foremilk</i>                                                |                        |
| 1st visit <sup>b</sup>                                                  | 22/32 (68.8 %)         |
| 2nd visit <sup>f</sup>                                                  | 21/21 (100 %)          |
| <i>Maternal hindmilk</i>                                                |                        |
| 1st visit <sup>b</sup>                                                  | 21/32 (65.6 %)         |
| 2nd visit <sup>e</sup>                                                  | 22/22 (100 %)          |
| <i>Infant feces</i>                                                     |                        |
| 1st visit                                                               | 32/34 (94.1 %)         |
| 2nd visit <sup>e</sup>                                                  | 30/33 (90.1 %)         |
| <b>Samples with HMO data</b>                                            |                        |
| <i>Maternal breast milk (mix of fore- and hindmilk)</i>                 |                        |
| 1st visit <sup>b</sup>                                                  | 32/32 (100 %)          |
| 2nd visit <sup>d</sup>                                                  | 26/26 (100 %)          |
| <i>Infant feces</i>                                                     |                        |
| 1st visit <sup>b</sup>                                                  | 32/32 (100 %)          |
| 2nd visit <sup>e</sup>                                                  | 33/33 (100 %)          |

<sup>1</sup>Data or sample missing from a) 1, b) 2, c) 5, d) 8, e) 12 and f) 13 individuals

<sup>2</sup>See definition in Larsson *et al.*, 2018 Nutrients; DOI:10.3390/nu10091290

Table S2 - Overview of samples and data

| SKOT III ID | qPCR data           |                 |                 |                     |                 | Microbiota data     |                 |                 |                     |                 | HMO data            |              |                     |              |                    |
|-------------|---------------------|-----------------|-----------------|---------------------|-----------------|---------------------|-----------------|-----------------|---------------------|-----------------|---------------------|--------------|---------------------|--------------|--------------------|
|             | Infant age 5 months |                 |                 | Infant age 9 months |                 | Infant age 5 months |                 |                 | Infant age 9 months |                 | Infant age 5 months |              | Infant age 9 months |              |                    |
|             | Feces (n=34)        | Foremilk (n=32) | Hindmilk (n=32) | Foremilk (n=21)     | Hindmilk (n=22) | Feces (n=32)        | Foremilk (n=22) | Hindmilk (n=21) | Feces (n=30)        | Foremilk (n=21) | Hindmilk (n=22)     | Feces (n=32) | Breast milk (n=32)  | Feces (n=33) | Breast milk (n=26) |
| 1           |                     |                 |                 |                     |                 |                     |                 |                 |                     | #               | #                   |              |                     |              |                    |
| 2           |                     |                 |                 |                     |                 |                     |                 |                 |                     | #               | #                   |              |                     |              |                    |
| 3           |                     |                 |                 |                     |                 |                     |                 |                 |                     |                 |                     |              |                     |              |                    |
| 4           |                     |                 |                 |                     |                 |                     |                 |                 |                     |                 |                     |              |                     |              |                    |
| 5           |                     |                 |                 |                     |                 |                     |                 |                 |                     |                 |                     |              |                     |              |                    |
| 6           |                     |                 |                 |                     |                 |                     |                 |                 |                     |                 |                     |              |                     |              |                    |
| 7           |                     |                 |                 |                     |                 |                     |                 |                 |                     |                 |                     |              |                     |              |                    |
| 8           |                     |                 |                 |                     |                 |                     |                 |                 |                     |                 |                     |              |                     |              |                    |
| 9           |                     |                 |                 |                     |                 |                     |                 |                 |                     |                 |                     |              |                     |              |                    |
| 10          |                     |                 |                 |                     |                 |                     |                 |                 |                     |                 |                     |              |                     |              |                    |
| 11          |                     |                 |                 |                     |                 |                     |                 |                 |                     |                 |                     |              |                     |              |                    |
| 12          |                     |                 |                 |                     |                 |                     |                 |                 |                     |                 |                     |              |                     |              |                    |
| 13          |                     |                 |                 |                     |                 |                     |                 |                 |                     |                 |                     |              |                     |              |                    |
| 14          |                     |                 |                 |                     |                 |                     |                 |                 |                     |                 |                     |              |                     |              |                    |
| 15          |                     |                 |                 |                     |                 |                     |                 |                 |                     |                 |                     |              |                     |              |                    |
| 16          |                     |                 |                 |                     |                 |                     |                 |                 |                     |                 |                     |              |                     |              |                    |
| 17          |                     |                 |                 |                     |                 |                     |                 |                 |                     |                 |                     |              |                     |              |                    |
| 18          |                     |                 |                 |                     |                 |                     |                 |                 |                     |                 |                     |              |                     |              |                    |
| 19          |                     |                 |                 |                     |                 |                     |                 |                 |                     |                 |                     |              |                     |              |                    |
| 20          |                     |                 |                 |                     |                 |                     |                 |                 |                     |                 |                     |              |                     |              |                    |
| 21          |                     |                 |                 |                     |                 |                     |                 |                 |                     |                 |                     |              |                     |              |                    |
| 22          |                     |                 |                 |                     |                 |                     |                 |                 |                     |                 |                     |              |                     |              |                    |
| 23          |                     |                 |                 |                     |                 |                     |                 |                 |                     |                 |                     |              |                     |              |                    |
| 24          |                     |                 |                 |                     |                 |                     |                 |                 |                     |                 |                     |              |                     |              |                    |
| 25          |                     |                 |                 |                     |                 |                     |                 |                 |                     |                 |                     |              |                     |              |                    |
| 26          |                     |                 |                 |                     |                 |                     |                 |                 |                     |                 |                     |              |                     |              |                    |
| 27          |                     |                 |                 |                     |                 |                     |                 |                 |                     |                 |                     |              |                     |              |                    |
| 28          |                     |                 |                 |                     |                 |                     |                 |                 |                     |                 |                     |              |                     |              |                    |
| 29          |                     |                 |                 |                     |                 |                     |                 |                 |                     |                 |                     |              |                     |              |                    |
| 30          |                     |                 |                 |                     |                 |                     |                 |                 |                     |                 |                     |              |                     |              |                    |
| 31          |                     |                 |                 |                     |                 |                     |                 |                 |                     |                 |                     |              |                     |              |                    |
| 32          |                     |                 |                 |                     |                 |                     |                 |                 |                     |                 |                     |              |                     |              |                    |
| 33          |                     |                 |                 |                     |                 |                     |                 |                 |                     |                 |                     |              |                     |              |                    |
| 34          |                     |                 |                 |                     |                 |                     |                 |                 |                     |                 |                     |              |                     |              |                    |

**Colorkey**

- Sample analyzed
- Sample not analyzed
- Missing sample
- Sequencing failed or too few reads
- # Fore and hindmilk sampled on separate days/breastfeeding sessions

| Taxa <sup>1</sup>        | Infant age 5 months                              |                                                  |                      |                       | Infant age 9 months                              |                                                  |                      |                       |
|--------------------------|--------------------------------------------------|--------------------------------------------------|----------------------|-----------------------|--------------------------------------------------|--------------------------------------------------|----------------------|-----------------------|
|                          | Average relative abundance in foremilk (%), n=22 | Average relative abundance in hindmilk (%), n=21 | P-value <sup>2</sup> | FDR corrected P-value | Average relative abundance in foremilk (%), n=21 | Average relative abundance in hindmilk (%), n=22 | P-value <sup>2</sup> | FDR corrected P-value |
| <i>Streptococcus</i>     | 42.208                                           | 47.144                                           | 0.15360              | 0.32288               | 34.053                                           | 40.177                                           | 0.22900              | 0.38167               |
| <i>Staphylococcus</i>    | 15.396                                           | 3.641                                            | <b>&lt;0.00001</b>   | <b>&lt;0.00001</b>    | 17.734                                           | 2.996                                            | <b>&lt;0.00001</b>   | <b>&lt;0.00001</b>    |
| <i>Bacillus</i>          | 6.531                                            | 7.182                                            | 0.62260              | 0.71838               | 6.640                                            | 8.886                                            | 0.40230              | 0.58895               |
| <i>Pseudomonas</i>       | 9.445                                            | 6.233                                            | 0.37550              | 0.56325               | 4.501                                            | 3.466                                            | 0.11020              | 0.25157               |
| <i>Acinetobacter</i>     | 5.367                                            | 7.182                                            | 0.44730              | 0.60995               | 7.001                                            | 4.192                                            | <b>0.00290</b>       | <b>0.02175</b>        |
| <i>Propionibacterium</i> | 1.792                                            | 2.720                                            | 0.13270              | 0.32288               | 6.080                                            | 10.461                                           | 0.59130              | 0.68227               |
| <i>Veillonella</i>       | 2.186                                            | 6.250                                            | <b>0.00830</b>       | <b>0.04150</b>        | 2.612                                            | 4.067                                            | 0.11720              | 0.25157               |
| <i>Rothia</i>            | 2.156                                            | 2.551                                            | 0.78410              | 0.84011               | 2.422                                            | 2.809                                            | 0.43190              | 0.58895               |
| <i>Gemella</i>           | 1.507                                            | 1.462                                            | 0.86950              | 0.86950               | 2.562                                            | 2.200                                            | 0.81170              | 0.81170               |
| <i>Neisseria</i>         | 0.095                                            | 0.450                                            | 0.05630              | 0.16890               | 1.751                                            | 4.831                                            | <b>0.01240</b>       | 0.06200               |
| <i>Granulicatella</i>    | 1.002                                            | 1.852                                            | 0.22530              | 0.37550               | 1.421                                            | 2.175                                            | 0.11740              | 0.25157               |
| <i>Corynebacterium</i>   | 1.402                                            | 1.088                                            | 0.57980              | 0.71838               | 1.803                                            | 1.652                                            | 0.76800              | 0.81170               |
| <i>Actinomyces</i>       | 0.512                                            | 1.838                                            | <b>0.01640</b>       | 0.06150               | 0.952                                            | 1.713                                            | 0.22530              | 0.38167               |
| <i>Caulobacter</i>       | 0.081                                            | 2.061                                            | 0.17220              | 0.32288               | 1.001                                            | 1.022                                            | 0.54160              | 0.67700               |
| <i>Prevotella</i>        | 0.076                                            | 0.381                                            | <b>0.00450</b>       | <b>0.03375</b>        | 2.258                                            | 1.299                                            | 0.11110              | 0.25157               |

<sup>1</sup>Only taxa with an average relative abundance >1% across milk fractions and age were included

<sup>2</sup>Statistical significance was evaluated by Wilcoxon signed rank test

| Table S4 - Relative abundance of the most abundant ASVs found in foremilk vs hindmilk at infant age 5 and 9 months |                                                  |                                                  |                      |                       |                                                  |                                                  |                      |                       |                                                                                                                 | nBLAST top hit against NCBI 16S rRNA sequence database <sup>3</sup> |              |
|--------------------------------------------------------------------------------------------------------------------|--------------------------------------------------|--------------------------------------------------|----------------------|-----------------------|--------------------------------------------------|--------------------------------------------------|----------------------|-----------------------|-----------------------------------------------------------------------------------------------------------------|---------------------------------------------------------------------|--------------|
| ASV <sup>1</sup>                                                                                                   | Infant age 5 months                              |                                                  |                      |                       | Infant age 9 months                              |                                                  |                      |                       | RDP taxonomy                                                                                                    | Taxonomy                                                            | Identity (%) |
|                                                                                                                    | Average relative abundance in foremilk (%), n=22 | Average relative abundance in hindmilk (%), n=21 | P-value <sup>2</sup> | FDR corrected P-value | Average relative abundance in foremilk (%), n=21 | Average relative abundance in hindmilk (%), n=22 | P-value <sup>2</sup> | FDR corrected P-value |                                                                                                                 |                                                                     |              |
| ASV_2                                                                                                              | 21.992                                           | 19.723                                           | 0.9187               | 1.0000                | 18.602                                           | 19.950                                           | 0.8666               | 0.9497                | Bacteria_Firmicutes_Bacilli_Lactobacillales_Streptococcaceae_Streptococcus                                      |                                                                     |              |
| ASV_3                                                                                                              | 13.136                                           | 3.103                                            | <b>4.77E-06</b>      | <b>0.0004</b>         | 15.305                                           | 2.273                                            | <b>1.31E-04</b>      | <b>0.0105</b>         | Bacteria_Firmicutes_Bacilli_Bacillales_Staphylococcaceae_Staphylococcus                                         | <i>Staphylococcus epidermidis</i>                                   | 100          |
| ASV_4                                                                                                              | 3.902                                            | 6.801                                            | 0.5073               | 0.8811                | 6.312                                            | 8.483                                            | 0.2549               | 0.5249                | Bacteria_Firmicutes_Bacilli_Bacillales_Bacillaceae_1_Bacillus                                                   |                                                                     |              |
| ASV_6                                                                                                              | 5.695                                            | 7.111                                            | 0.1031               | 0.5161                | 4.620                                            | 5.575                                            | 0.0967               | 0.3753                | Bacteria_Firmicutes_Bacilli_Lactobacillales_Streptococcaceae_Streptococcus                                      |                                                                     |              |
| ASV_5                                                                                                              | 1.784                                            | 2.683                                            | 0.1032               | 0.5161                | 6.061                                            | 10.427                                           | 0.5854               | 0.7938                | Bacteria_Actinobacteria_Actinobacteria_Actinomycetales_Propionibacteriaceae_Propionibacterium_acnes             |                                                                     |              |
| ASV_9                                                                                                              | 4.205                                            | 5.037                                            | 0.0826               | 0.5081                | 2.072                                            | 3.672                                            | 0.0421               | 0.2593                | Bacteria_Firmicutes_Bacilli_Lactobacillales_Streptococcaceae_Streptococcus                                      |                                                                     |              |
| ASV_8                                                                                                              | 3.894                                            | 3.056                                            | 0.8885               | 1.0000                | 4.406                                            | 3.436                                            | 0.9645               | 1.0000                | Bacteria_Proteobacteria_Gammaproteobacteria_Pseudomonadales_Pseudomonadaceae_Pseudomonas                        |                                                                     |              |
| ASV_12                                                                                                             | 2.570                                            | 6.255                                            | <b>0.0029</b>        | <b>0.0762</b>         | 1.339                                            | 2.324                                            | 0.1126               | 0.3753                | Bacteria_Firmicutes_Bacilli_Lactobacillales_Streptococcaceae_Streptococcus                                      | <i>Streptococcus lactarius/porosis</i>                              | 99.38        |
| ASV_11                                                                                                             | 1.062                                            | 5.192                                            | <b>0.0021</b>        | <b>0.0762</b>         | 1.501                                            | 2.464                                            | 0.1098               | 0.3753                | Bacteria_Firmicutes_Negativicutes_Selenomonadales_Veillonellaceae_Veillonella                                   | <i>Veillonella diapar</i>                                           | 100          |
| ASV_16                                                                                                             | 2.062                                            | 3.993                                            | <b>0.0063</b>        | <b>0.1005</b>         | 1.307                                            | 1.754                                            | 0.0545               | 0.2863                | Bacteria_Firmicutes_Bacilli_Lactobacillales_Streptococcaceae_Streptococcus                                      | <i>Streptococcus lactarius</i>                                      | 100          |
| ASV_19                                                                                                             | 2.113                                            | 2.497                                            | 0.7795               | 1.0000                | 1.421                                            | 1.455                                            | 0.8348               | 0.9380                | Bacteria_Actinobacteria_Actinobacteria_Actinomycetales_Micrococcaceae_Rothia_mucluginosa                        |                                                                     |              |
| ASV_14                                                                                                             | 1.380                                            | 1.435                                            | 0.6748               | 0.9308                | 2.688                                            | 1.823                                            | <b>0.0044</b>        | <b>0.0750</b>         | Bacteria_Proteobacteria_Gammaproteobacteria_Pseudomonadales_Moraxellaceae_Acinetobacter                         | <i>Acinetobacter johnsonii</i>                                      | 100          |
| ASV_22                                                                                                             | 1.372                                            | 1.692                                            | 0.2862               | 0.7830                | 1.269                                            | 2.294                                            | 0.0894               | 0.3753                | Bacteria_Firmicutes_Bacilli_Lactobacillales_Streptococcaceae_Streptococcus_peroris                              |                                                                     |              |
| ASV_27                                                                                                             | 2.229                                            | 1.651                                            | 0.2250               | 0.6923                | 0.892                                            | 1.550                                            | 0.1951               | 0.4540                | Bacteria_Firmicutes_Bacilli_Lactobacillales_Streptococcaceae_Streptococcus_mitis                                |                                                                     |              |
| ASV_41                                                                                                             | 0.915                                            | 0.899                                            | 0.8917               | 1.0000                | 1.478                                            | 1.166                                            | 0.5854               | 0.7938                | Bacteria_Firmicutes_Bacilli_Bacillales_Bacillales_Incertae_Sedis_XI_Gemella                                     |                                                                     |              |
| ASV_43                                                                                                             | 0.081                                            | 2.061                                            | 0.1816               | 0.6054                | 1.001                                            | 1.022                                            | 0.5097               | 0.7551                | Bacteria_Proteobacteria_Alphaproteobacteria_Caulobacteriales_Caulobacteraceae_Caulobacter                       |                                                                     |              |
| ASV_49                                                                                                             | 0.004                                            | 0.242                                            | 0.5176               | 0.8811                | 0.621                                            | 3.069                                            | 0.0608               | 0.2863                | Bacteria_Proteobacteria_Betaproteobacteria_Neisseriales_Neisseriaceae_Neisseria                                 |                                                                     |              |
| ASV_45                                                                                                             | 2.558                                            | 1.243                                            | 0.5839               | 0.8900                | 0.003                                            | 0.001                                            | 0.3711               | 0.6454                | Bacteria_Proteobacteria_Gammaproteobacteria_Pseudomonadales_Pseudomonadaceae_Pseudomonas                        |                                                                     |              |
| ASV_38                                                                                                             | 0.199                                            | 1.968                                            | 0.6494               | 0.9264                | 1.401                                            | 0.268                                            | 0.1873               | 0.4540                | Bacteria_Proteobacteria_Gammaproteobacteria_Pseudomonadales_Moraxellaceae_Acinetobacter                         |                                                                     |              |
| ASV_25                                                                                                             | 1.129                                            | 1.239                                            | 0.8888               | 1.0000                | 0.729                                            | 0.568                                            | 0.0464               | 0.2653                | Bacteria_Proteobacteria_Gammaproteobacteria_Pseudomonadales_Moraxellaceae_Acinetobacter                         |                                                                     |              |
| ASV_31                                                                                                             | 0.812                                            | 0.860                                            | 0.7598               | 0.9964                | 1.143                                            | 0.751                                            | <b>0.0047</b>        | <b>0.0750</b>         | Bacteria_Proteobacteria_Gammaproteobacteria_Pseudomonadales_Moraxellaceae_Acinetobacter                         | <i>Acinetobacter johnsonii</i>                                      | 99.38        |
| ASV_51                                                                                                             | 0.291                                            | 0.690                                            | 0.4483               | 0.8340                | 1.800                                            | 0.796                                            | 0.8442               | 0.9380                | Bacteria_Firmicutes_Bacilli_Lactobacillales_Streptococcaceae_Streptococcus_pneumoniae                           |                                                                     |              |
| ASV_30                                                                                                             | 2.275                                            | 0.265                                            | 0.1258               | 0.5297                | 0.314                                            | 0.570                                            | 0.5692               | 0.7938                | Bacteria_Proteobacteria_Alphaproteobacteria_Sphingomonadales_Sphingomonadaceae                                  |                                                                     |              |
| ASV_56                                                                                                             | 0.301                                            | 0.994                                            | <b>0.0138</b>        | 0.1391                | 0.773                                            | 1.182                                            | <b>0.0196</b>        | 0.1962                | Bacteria_Firmicutes_Bacilli_Lactobacillales_Carnobacteriaceae_Granulicatella                                    |                                                                     |              |
| ASV_54                                                                                                             | 2.562                                            | 0.308                                            | 0.3491               | 0.8197                | 0.025                                            | 0.010                                            | 0.1775               | 0.4540                | Bacteria_Firmicutes_Bacilli_Bacillales_Bacillaceae_1_Bacillus                                                   |                                                                     |              |
| ASV_29                                                                                                             | 1.684                                            | 1.188                                            | 0.1169               | 0.5297                | 0.035                                            | 0.001                                            | 0.1411               | 0.4516                | Bacteria_Proteobacteria_Gammaproteobacteria_Pseudomonadales_Pseudomonadaceae_Pseudomonas                        |                                                                     |              |
| ASV_57                                                                                                             | 0.641                                            | 0.668                                            | 1.0000               | 1.0000                | 0.547                                            | 0.862                                            | 0.5392               | 0.7843                | Bacteria_Firmicutes_Bacilli_Lactobacillales_Carnobacteriaceae_Granulicatella_elegans                            |                                                                     |              |
| ASV_62                                                                                                             | 0.697                                            | 0.148                                            | <b>0.0052</b>        | <b>0.1005</b>         | 1.356                                            | 0.234                                            | <b>0.0003</b>        | <b>0.0109</b>         | Bacteria_Firmicutes_Bacilli_Bacillales_Staphylococcaceae_Staphylococcus_epidermidis                             | <i>Staphylococcus epidermidis</i>                                   | 100          |
| ASV_94                                                                                                             | 1.905                                            | 0.020                                            | 0.5294               | 0.8823                | 0.257                                            | 0.003                                            | 0.0583               | 0.2863                | Bacteria_Proteobacteria_Betaproteobacteria_Burkholderiales_Burkholderiales_Incertae_sedis_Aquabacterium_commune |                                                                     |              |
| ASV_67                                                                                                             | 0.266                                            | 0.775                                            | 0.1242               | 0.5297                | 0.387                                            | 0.572                                            | 0.1556               | 0.4540                | Bacteria_Actinobacteria_Actinobacteria_Actinomycetales_Actinomycetaceae_Actinomycetes_odontolyticus             |                                                                     |              |
| ASV_82                                                                                                             | 0.196                                            | 0.176                                            | 0.7223               | 0.9630                | 1.080                                            | 0.373                                            | 0.8015               | 0.9380                | Bacteria_Actinobacteria_Actinobacteria_Actinomycetales_Corynebacteriaceae_Corynebacterium_kroppenstedtii        |                                                                     |              |
| ASV_7                                                                                                              | 0.205                                            | 1.107                                            | 0.3838               | 0.8197                | 0.225                                            | 0.287                                            | 0.7022               | 0.8512                | Bacteria_Actinobacteria_Actinobacteria_Bifidobacteriales_Bifidobacteriaceae_Bifidobacterium_longum              |                                                                     |              |
| ASV_75                                                                                                             | 0.532                                            | 0.393                                            | 0.9039               | 1.0000                | 0.328                                            | 0.483                                            | 0.8813               | 0.9517                | Bacteria_Firmicutes_Negativicutes_Selenomonadales_Veillonellaceae                                               |                                                                     |              |
| ASV_91                                                                                                             | 0.027                                            | 0.235                                            | 0.2408               | 0.7135                | 0.380                                            | 0.944                                            | <b>0.0141</b>        | 0.1610                | Bacteria_Bacteroidetes_Bacteroidia_Bacteroidales_Prevotellaceae_Prevotella_melanigenica                         |                                                                     |              |
| ASV_102                                                                                                            | 0.015                                            | 0.031                                            | 0.1422               | 0.5418                | 1.371                                            | 0.022                                            | 0.6219               | 0.8292                | Bacteria_Bacteroidetes_Bacteroidia_Bacteroidales_Prevotellaceae_Prevotella                                      |                                                                     |              |
| ASV_78                                                                                                             | 0.195                                            | 0.652                                            | 0.1705               | 0.5929                | 0.280                                            | 0.276                                            | 0.1633               | 0.4540                | Bacteria_Proteobacteria_Gammaproteobacteria_Pseudomonadales_Moraxellaceae_Enhydrobacter_aerosaccus              |                                                                     |              |
| ASV_92                                                                                                             | 0.300                                            | 0.643                                            | 0.3518               | 0.8197                | 0.247                                            | 0.195                                            | 0.9653               | 1.0000                | Bacteria_Actinobacteria_Actinobacteria_Actinomycetales_Corynebacteriaceae_Corynebacterium                       |                                                                     |              |
| ASV_97                                                                                                             | 0.192                                            | 0.476                                            | 0.0503               | 0.4028                | 0.238                                            | 0.407                                            | 0.4443               | 0.7268                | Bacteria_Firmicutes_Negativicutes_Selenomonadales_Veillonellaceae_Veillonella                                   |                                                                     |              |
| ASV_113                                                                                                            | 0.067                                            | 0.095                                            | 0.3430               | 0.8197                | 0.398                                            | 0.741                                            | 0.1834               | 0.4540                | Bacteria_Proteobacteria_Betaproteobacteria_Neisseriales_Neisseriaceae_Neisseria                                 |                                                                     |              |
| ASV_95                                                                                                             | 0.681                                            | 0.093                                            | 0.0608               | 0.4053                | 0.450                                            | 0.507                                            | <b>0.0337</b>        | 0.2368                | Bacteria_Firmicutes_Bacilli_Bacillales_Staphylococcaceae_Staphylococcus                                         | <i>Staphylococcus hominis</i>                                       | 100          |
| ASV_101                                                                                                            | 0.019                                            | 0.004                                            | 0.4726               | 0.8594                | 0.440                                            | 0.833                                            | 0.2945               | 0.5479                | Bacteria_Actinobacteria_Actinobacteria_Actinomycetales_Micrococcaceae_Rothia_mucluginosa                        |                                                                     |              |
| ASV_87                                                                                                             | 0.656                                            | 0.592                                            | 0.5896               | 0.8900                | 0.004                                            | 0.001                                            | 0.2463               | 0.5249                | Bacteria_Proteobacteria_Alphaproteobacteria_Rhizobiales_Rhizobiaceae_Rhizobium                                  |                                                                     |              |
| ASV_119                                                                                                            | 0.022                                            | 0.061                                            | 0.3711               | 0.8197                | 0.279                                            | 0.834                                            | 0.1003               | 0.3753                | Bacteria_Actinobacteria_Actinobacteria_Actinomycetales_Corynebacteriaceae_Corynebacterium_argentoratense        |                                                                     |              |
| ASV_90                                                                                                             | 0.306                                            | 0.256                                            | 0.6600               | 0.9264                | 0.144                                            | 0.381                                            | 0.2659               | 0.5249                | Bacteria_Bacteroidetes_Bacteroidia_Bacteroidales_Prevotellaceae_Alloprevotella                                  |                                                                     |              |
| ASV_118                                                                                                            | 0.005                                            | 0.020                                            | 1.0000               | 1.0000                | 0.544                                            | 0.505                                            | 0.7595               | 0.9068                | Bacteria_Actinobacteria_Actinobacteria_Actinomycetales_Micrococcaceae_Rothia                                    |                                                                     |              |
| ASV_125                                                                                                            | 0.058                                            | 0.012                                            | 0.6493               | 0.9264                | 0.346                                            | 0.643                                            | 0.0828               | 0.3681                | Bacteria_Firmicutes_Bacilli_Lactobacillales_Streptococcaceae_Streptococcus_sanguinis                            |                                                                     |              |
| ASV_96                                                                                                             | 0.404                                            | 0.339                                            | 0.3974               | 0.8197                | 0.285                                            | 0.008                                            | 0.2885               | 0.5479                | Bacteria_Proteobacteria_Alphaproteobacteria_Sphingomonadales_Sphingomonadaceae_Sphingomonas                     |                                                                     |              |
| ASV_106                                                                                                            | 0.415                                            | 0.235                                            | 0.8960               | 1.0000                | 0.156                                            | 0.206                                            | 0.6580               | 0.8490                | Bacteria_Firmicutes_Negativicutes_Selenomonadales_Veillonellaceae_Veillonella                                   |                                                                     |              |
| ASV_128                                                                                                            | 0.022                                            | 0.021                                            | 0.7214               | 0.9630                | 0.567                                            | 0.393                                            | 0.6832               | 0.8497                | Bacteria_Firmicutes_Bacilli_Bacillales_Bacillales_Incertae_Sedis_XI_Gemella                                     |                                                                     |              |
| ASV_127                                                                                                            | 0.001                                            | 0.081                                            | 0.4098               | 0.8197                | 0.409                                            | 0.437                                            | 0.8160               | 0.9380                | Bacteria_Fusobacteria_Fusobacteria_Fusobacteriales_Leptotrichiaceae_Streptobacillus                             |                                                                     |              |
| ASV_131                                                                                                            | 0.426                                            | 0.317                                            | 0.2220               | 0.6923                | 0.116                                            | 0.059                                            | 0.2330               | 0.5249                | Bacteria_Firmicutes_Bacilli_Bacillales_Bacillales_Incertae_Sedis_XI_Gemella                                     |                                                                     |              |
| ASV_149                                                                                                            | 0.000                                            | 0.000                                            | 1.0000               | 1.0000                | 0.458                                            | 0.436                                            | 0.8339               | 0.9380                | Bacteria_Proteobacteria_Betaproteobacteria_Neisseriales_Neisseriaceae_Neisseria                                 |                                                                     |              |
| ASV_110                                                                                                            | 0.001                                            | 0.043                                            | 1.0000               | 1.0000                | 0.108                                            | 0.691                                            | 0.2861               | 0.5322                | Bacteria_Fusobacteria_Fusobacteria_Fusobacteriales_Fusobacteriaceae_Cetobacterium                               |                                                                     |              |
| ASV_137                                                                                                            | 0.372                                            | 0.228                                            | 0.9057               | 1.0000                | 0.064                                            | 0.087                                            | 0.4017               | 0.6837                | Bacteria_Bacteroidetes_Bacteroidia_Bacteroidales_Prevotellaceae_Alloprevotella                                  |                                                                     |              |
| ASV_151                                                                                                            | 0.000                                            | 0.004                                            | 0.3711               | 0.8197                | 0.065                                            | 0.655                                            | 0.3107               | 0.5650                | Bacteria_Fusobacteria_Fusobacteria_Fusobacteriales_Leptotrichiaceae_Leptotrichia                                |                                                                     |              |
| ASV_154                                                                                                            | 0.081                                            | 0.198                                            | 0.2553               | 0.7295                | 0.140                                            | 0.304                                            | 0.1819               | 0.4540                | Bacteria_Bacteroidetes_Bacteroidia_Bacteroidales_Porphyrionadaceae                                              |                                                                     |              |
| ASV_162                                                                                                            | 0.034                                            | 0.001                                            | <b>0.0422</b>        | 0.3747                | 0.696                                            | 0.004                                            | 0.1508               | 0.4540                | Bacteria_Proteobacteria_Alphaproteobacteria_Sphingomonadales_Sphingomonadaceae_Sphingomonas                     |                                                                     |              |
| ASV_126                                                                                                            | 0.035                                            | 0.028                                            | 0.4227               | 0.8247                | 0.230                                            | 0.414                                            | <b>0.0249</b>        | 0.2210                | Bacteria_Firmicutes_Negativicutes_Selenomonadales_Veillonellaceae_Veillonella                                   |                                                                     |              |
| ASV_152                                                                                                            | 0.151                                            | 0.060                                            | 0.3375               | 0.8197                | 0.264                                            | 0.230                                            | 0.4452               | 0.7268                | Bacteria_Firmicutes_Bacilli_Lactobacillales_Streptococcaceae_Streptococcus                                      |                                                                     |              |
| ASV_148                                                                                                            | 0.249                                            | 0.444                                            | 0.9325               | 1.0000                | 0.012                                            | 0.001                                            | 0.2785               | 0.5434                | Bacteria_Proteobacteria_Gammaproteobacteria_Pseudomonadales_Pseudomonadaceae_Pseudomonas                        |                                                                     |              |
| ASV_167                                                                                                            | 0.182                                            | 0.113                                            | 1.0000               | 1.0000                | 0.364                                            | 0.036                                            | 0.3711               | 0.6454                | Bacteria_Firmicutes_Bacilli_Lactobacillales_Streptococcaceae_Streptococcus_urenalis                             |                                                                     |              |
| ASV_157                                                                                                            | 0.457                                            | 0.035                                            | 0.1422               | 0.5418                | 0.103                                            | 0.060                                            | 0.5746               | 0.7938                | Bacteria_Actinobacteria_Actinobacteria_Actinomycetales_Corynebacteriaceae_Corynebacterium_kroppenstedtii        |                                                                     |              |
| ASV_164                                                                                                            | 0.033                                            | 0.077                                            | 0.2936               | 0.7830                | 0.207                                            | 0.344                                            | <b>0.0294</b>        | 0.2352                | Bacteria_Firmicutes_Bacilli_Bacillales_Bacillales_Incertae_Sedis_XI_Gemella_sanguinis                           |                                                                     |              |
| ASV_109                                                                                                            | 0.195                                            | 0.227                                            | 0.4406               | 0.8340                | 0.146                                            | 0.095                                            | 0.5044               | 0.7551                | Bacteria_Proteobacteria_Gammaproteobacteria_Pseudomonadales_Moraxellaceae_Acinetobacter                         |                                                                     |              |
| ASV_165                                                                                                            | 0.008                                            | 0.005                                            | 0.6432               | 0.9264                | 0.297                                            | 0.325                                            | 0.4561               | 0.7298                | Bacteria_Firmicutes_Bacilli_Lactobacillales_Streptococcaceae_Streptococcus                                      |                                                                     |              |
| ASV_103                                                                                                            | 0.164                                            | 0.216                                            | 0.9441               | 1.0000                | 0.169                                            | 0.084                                            | 0.1064               | 0.3753                | Bacteria_Proteobacteria_Gammaproteobacteria_Pseudomonadales_Moraxellaceae_Acinetobacter_johnsonii               |                                                                     |              |
| ASV_166                                                                                                            | 0.397                                            | 0.102                                            | <b>0.0089</b>        | 0.1188                | 0.110                                            | 0.011                                            | <b>0.0055</b>        | 0.2368                | Bacteria_Firmicutes_Bacilli_Bacillales_Staphylococcaceae_Staphylococcus                                         | <i>Staphylococcus epidermidis</i>                                   | 100          |
| ASV_173                                                                                                            | 0.034                                            | 0.026                                            | 0.5474               | 0.8900                | 0.309                                            | 0.243                                            | 1.0000               | 1.0000                | Bacteria_Firmicutes_Bacilli_Lactobacillales_Streptococcaceae_Streptococcus                                      |                                                                     |              |
| ASV_161                                                                                                            | 0.027                                            | 0.288                                            | 0.0580               | 0.4053                | 0.117                                            | 0.179                                            | 0.6377               | 0.8364                | Bacteria_Actinobacteria_Actinobacteria_Actinomycetales_Actinomycetaceae_Actinomycetes_odontolyticus             | <i>Staphylococcus epidermidis</i>                                   | 100          |
| ASV_172                                                                                                            | 0.167                                            | 0.021                                            | <b>0.0139</b>        | 0.1391                | 0.208                                            | 0.197                                            | 0.6827               | 0.8497                | Bacteria_Firmicutes_Bacilli_Bacillales_Staphylococcaceae_Staphylococcus                                         |                                                                     |              |
| ASV_153                                                                                                            | 0.560                                            | <b>0.000</b>                                     | 0.0975               | 0.5161                | 0.006                                            | 0.002                                            | 0.4778               | 0.7351                | Bacteria_Proteobacteria_Gammaproteobacteria_Pseudomonadales_Pseudomonadaceae_Pseudomonas                        |                                                                     |              |
| ASV_182                                                                                                            | 0.138                                            | 0.392                                            | 0.4017               | 0.8197                | 0.015                                            | 0.032                                            | 0.4756               | 0.7351                | Bacteria_Actinobacteria_Actinobacteria_Actinomycetales_Actinomycetaceae_Actinomycetes                           |                                                                     |              |
| ASV_139                                                                                                            | 0.295                                            | 0.218                                            | 0.5693               | 0.8900                | 0.023                                            | 0.014                                            | 0.6904               | 0.8497                | Bacteria_Firmicutes_Bacilli_Lactobacillales_Streptococcaceae_Streptococcus_salivarius                           |                                                                     |              |
| ASV_232                                                                                                            | 0.504                                            | 0.001                                            | 1.0000               | 1.0000                | 0.002                                            | 0.016                                            | 1.0000               | 1.0000                | Bacteria_Firmicutes_Bacilli_Lactobacillales_Streptococcaceae_Streptococcus                                      |                                                                     |              |
| ASV_176                                                                                                            | 0.008                                            | 0.029                                            | 0.1533               | 0.5575                | 0.097                                            | 0.387                                            | <b>0.0016</b>        | <b>0.0439</b>         | Bacteria_Actinobacteria_Actinobacteria_Actinomycetales_Actinomycetaceae_Actinomycetes                           |                                                                     |              |
| ASV_183                                                                                                            | 0.109                                            | 0.079                                            | 0.4858               | 0.8636                | 0.132                                            | 0.174                                            | 0.2120               | 0.4989                | Bacteria_Firmicutes_Bacilli_Lactobacillales_Streptococcaceae_Streptococcus_sanguinis                            |                                                                     |              |
| ASV_185                                                                                                            | 0.000                                            | 0.001                                            | 1.0000               | 1.0000                | 0.178                                            | 0.251                                            | 1.0000               | 1.0000                | Bacteria_Firmicutes_Bacilli_Bacillales_Bacillaceae_1_Bacillus                                                   |                                                                     |              |

Table S5 - ASVs shared between breast milk and infant feces in mother infant pairs

| ASV (Assigned taxonomy) <sup>1</sup>           | Shared with corresponding infant feces |                    |                    |                    | RDP taxonomy                                                                                          | nBLAST top hit against NCBI 16S rRNA sequence database <sup>2</sup> |              | Colorkey               |
|------------------------------------------------|----------------------------------------|--------------------|--------------------|--------------------|-------------------------------------------------------------------------------------------------------|---------------------------------------------------------------------|--------------|------------------------|
|                                                | Foremilk 5m (n=22)                     | Hindmilk 5m (n=21) | Foremilk 9m (n=21) | Hindmilk 9m (n=22) |                                                                                                       | Taxonomy                                                            | Identity (%) |                        |
|                                                |                                        |                    |                    |                    |                                                                                                       |                                                                     |              |                        |
| ASV 1 ( <i>Bifidobacterium longum</i> )        |                                        |                    |                    |                    | Bacteria Actinobacteria Actinobacteria Bifidobacteriales Bifidobacteriaceae Bifidobacterium longum    | <i>Bifidobacterium longum</i>                                       | 100          |                        |
| ASV 2 ( <i>Streptococcus mitis</i> group)      |                                        |                    |                    |                    | Bacteria Firmicutes Bacilli Lactobacillales Streptococcaceae Streptococcus                            | <i>Streptococcus mitis</i> group                                    | 100          | >3 mother-infant pairs |
| ASV 3 ( <i>Staphylococcus epidermidis</i> )    |                                        |                    |                    |                    | Bacteria Firmicutes Bacilli Bacillales Staphylococcaceae Staphylococcus                               | <i>Staphylococcus epidermidis</i>                                   | 100          | 3 mother infant pairs  |
| ASV 5 ( <i>Propionibacterium acne</i> )        |                                        |                    |                    |                    | Bacteria Actinobacteria Actinobacteria Actinomycetales Propionibacteriaceae Propionibacterium acnes   | <i>Propionibacterium acne</i>                                       | 100          | 2 mother infant pair   |
| ASV 6 ( <i>Streptococcus salivarius</i> )      |                                        |                    |                    |                    | Bacteria Firmicutes Bacilli Lactobacillales Streptococcaceae Streptococcus                            | <i>Streptococcus salivarius</i>                                     | 100          | 1 mother infant pair   |
| ASV 7 ( <i>Bifidobacterium longum</i> )        |                                        |                    |                    |                    | Bacteria Actinobacteria Actinobacteria Bifidobacteriales Bifidobacteriaceae Bifidobacterium longum    | <i>Bifidobacterium longum</i>                                       | 100          | Never shared           |
| ASV 9 ( <i>Streptococcus peroris</i> )         |                                        |                    |                    |                    | Bacteria Firmicutes Bacilli Lactobacillales Streptococcaceae Streptococcus                            | <i>Streptococcus peroris</i>                                        | 100          |                        |
| ASV 11 ( <i>Veillonella dispar</i> )           |                                        |                    |                    |                    | Bacteria Firmicutes Negativicutes Selenomonadales Veillonellaceae Veillonella                         | <i>Veillonella dispar</i>                                           | 100          |                        |
| ASV 12 ( <i>Streptococcus</i> spp.)            |                                        |                    |                    |                    | Bacteria Firmicutes Bacilli Lactobacillales Streptococcaceae Streptococcus                            | <i>Streptococcus lactarius/peroris</i>                              | 99.38        |                        |
| ASV 13 ( <i>Escherichia/Shigella</i> spp.)     |                                        |                    |                    |                    | Bacteria Proteobacteria Gammaproteobacteria Enterobacteriales Enterobacteriaceae Escherichia/Shigella | Multiple <i>Escherichia/Shigella</i> spp.                           | 100          |                        |
| ASV 16 ( <i>Streptococcus lactarius</i> )      |                                        |                    |                    |                    | Bacteria Firmicutes Bacilli Lactobacillales Streptococcaceae Streptococcus                            | <i>Streptococcus lactarius</i>                                      | 100          |                        |
| ASV 19 ( <i>Rothia mucilaginos</i> )           |                                        |                    |                    |                    | Bacteria Actinobacteria Actinobacteria Actinomycetales Micrococcaceae Rothia mucilaginos              | <i>Rothia mucilaginos</i>                                           | 100          |                        |
| ASV 21 ( <i>Veillonella</i> spp.)              |                                        |                    |                    |                    | Bacteria Firmicutes Negativicutes Selenomonadales Veillonellaceae Veillonella                         | <i>Veillonella dispar/tubetsuensis</i>                              | 99.38        |                        |
| ASV 22 ( <i>Streptococcus</i> spp.)            |                                        |                    |                    |                    | Bacteria Firmicutes Bacilli Lactobacillales Streptococcaceae Streptococcus peroris                    | <i>Streptococcus lactarius/peroris</i>                              | 99.38        |                        |
| ASV 27 ( <i>Streptococcus</i> spp.)            |                                        |                    |                    |                    | Bacteria Firmicutes Bacilli Lactobacillales Streptococcaceae Streptococcus mitis                      | <i>Streptococcus mitis</i> group                                    | 99.38        |                        |
| ASV 39 ( <i>Enterococcus faecalis</i> )        |                                        |                    |                    |                    | Bacteria Firmicutes Bacilli Lactobacillales Enterococcaceae Enterococcus                              | <i>Enterococcus faecalis</i>                                        | 100          |                        |
| ASV 41 ( <i>Gemella</i> spp.)                  |                                        |                    |                    |                    | Bacteria Firmicutes Bacilli Bacillales Bacillales Incertae Sedis XI Gemella                           | <i>Gemella taiwanensis/haemolyans</i>                               | 100          |                        |
| ASV 42 ( <i>Veillonella atypica</i> )          |                                        |                    |                    |                    | Bacteria Firmicutes Negativicutes Selenomonadales Veillonellaceae Veillonella                         | <i>Veillonella atypica</i>                                          | 100          |                        |
| ASV 46 ( <i>Lactobacillus casei</i> group)     |                                        |                    |                    |                    | Bacteria Firmicutes Bacilli Lactobacillales Lactobacillaceae Lactobacillus                            | <i>Lactobacillus casei</i> group                                    | 100          |                        |
| ASV 56 ( <i>Granulicatella adiacens</i> )      |                                        |                    |                    |                    | Bacteria Firmicutes Bacilli Lactobacillales Camobacteriaceae Granulicatella                           | <i>Granulicatella adiacens</i>                                      | 100          |                        |
| ASV 57 ( <i>Granulicatella elegans</i> )       |                                        |                    |                    |                    | Bacteria Firmicutes Bacilli Lactobacillales Camobacteriaceae Granulicatella elegans                   | <i>Granulicatella elegans</i>                                       | 100          |                        |
| ASV 67 ( <i>Actinomyces</i> spp.)              |                                        |                    |                    |                    | Bacteria Actinobacteria Actinobacteria Actinomycetales Actinomycetaceae Actinomyces odontolyticus     | <i>Actinomyces meyeri/odontolyticus</i>                             | 98.69        |                        |
| ASV 74 ( <i>Veillonella</i> spp.)              |                                        |                    |                    |                    | Bacteria Firmicutes Negativicutes Selenomonadales Veillonellaceae Veillonella dispar                  | <i>Veillonella atypica</i>                                          | 99.38        |                        |
| ASV 97 ( <i>Veillonella</i> spp.)              |                                        |                    |                    |                    | Bacteria Firmicutes Negativicutes Selenomonadales Veillonellaceae Veillonella                         | <i>Veillonella dispar/tubetsuensis</i>                              | 99.38        |                        |
| ASV 126 ( <i>Veillonella</i> spp.)             |                                        |                    |                    |                    | Bacteria Firmicutes Negativicutes Selenomonadales Veillonellaceae Veillonella                         | <i>Veillonella dispar/tubetsuensis</i>                              | 98.76        |                        |
| ASV 139 ( <i>Streptococcus thermophilus</i> )  |                                        |                    |                    |                    | Bacteria Firmicutes Bacilli Lactobacillales Streptococcaceae Streptococcus salivarius                 | <i>Streptococcus thermophilus</i>                                   | 100          |                        |
| ASV 152 ( <i>Streptococcus</i> spp.)           |                                        |                    |                    |                    | Bacteria Firmicutes Bacilli Lactobacillales Streptococcaceae Streptococcus                            | <i>Streptococcus mitis</i> group                                    | 99.38        |                        |
| ASV 161 ( <i>Actinomyces</i> spp.)             |                                        |                    |                    |                    | Bacteria Actinobacteria Actinobacteria Actinomycetales Actinomycetaceae Actinomyces odontolyticus     | <i>Actinomyces turicensis</i>                                       | 97.39        |                        |
| ASV 165 ( <i>Streptococcus parasanguinis</i> ) |                                        |                    |                    |                    | Bacteria Firmicutes Bacilli Lactobacillales Streptococcaceae Streptococcus                            | <i>Streptococcus parasanguinis</i>                                  | 100          |                        |
| ASV 176 ( <i>Actinomyces</i> spp.)             |                                        |                    |                    |                    | Bacteria Actinobacteria Actinobacteria Actinomycetales Actinomycetaceae Actinomyces                   | <i>Actinomyces meyeri</i>                                           | 99.35        |                        |
| ASV 178 ( <i>Lachnoanaerobaculum orale</i> )   |                                        |                    |                    |                    | Bacteria Firmicutes Clostridia Clostridiales Lachnospiraceae Lachnoanaerobaculum                      | <i>Lachnoanaerobaculum orale</i>                                    | 100          |                        |
| ASV 181 ( <i>Haemophilus parainfluenzae</i> )  |                                        |                    |                    |                    | Bacteria Proteobacteria Gammaproteobacteria Pasteurellales Pasteurellaceae Haemophilus parainfluenzae | <i>Haemophilus parainfluenzae</i>                                   | 100          |                        |
| ASV 182 ( <i>Actinomyces</i> spp.)             |                                        |                    |                    |                    | Bacteria Actinobacteria Actinobacteria Actinomycetales Actinomycetaceae Actinomyces                   | <i>Actinomyces turicensis</i>                                       | 96.73        |                        |
| ASV 188 ( <i>Streptococcus</i> spp.)           |                                        |                    |                    |                    | Bacteria Firmicutes Bacilli Lactobacillales Streptococcaceae Streptococcus                            | <i>Streptococcus sinensis</i>                                       | 99.38        |                        |
| ASV 191 ( <i>Atopobium parvulum</i> )          |                                        |                    |                    |                    | Bacteria Actinobacteria Actinobacteria Coriobacteriales Coriobacteriaceae Atopobium parvulum          | <i>Atopobium parvulum</i>                                           | 100          |                        |
| ASV 213 ( <i>Gemella</i> spp.)                 |                                        |                    |                    |                    | Bacteria Firmicutes Bacilli Bacillales Bacillales Incertae Sedis XI Gemella                           | <i>Gemella taiwanensis/haemolyans</i>                               | 99.38        |                        |
| ASV 251 ( <i>Veillonella rogosae</i> )         |                                        |                    |                    |                    | Bacteria Firmicutes Negativicutes Selenomonadales Veillonellaceae Veillonella rogosae                 | <i>Veillonella rogosae</i>                                          | 100          |                        |
| ASV 257 ( <i>Actinomyces</i> spp.)             |                                        |                    |                    |                    | Bacteria Actinobacteria Actinobacteria Actinomycetales Actinomycetaceae Actinomyces                   | <i>Actinomyces meyeri/odontolyticus</i>                             | 97.37        |                        |
| ASV 378 ( <i>Haemophilus</i> spp.)             |                                        |                    |                    |                    | Bacteria Proteobacteria Gammaproteobacteria Pasteurellales Pasteurellaceae Haemophilus sputorum       | <i>Haemophilus sputorum</i>                                         | 99.38        |                        |
| ASV 535 ( <i>Haemophilus</i> spp.)             |                                        |                    |                    |                    | Bacteria Proteobacteria Gammaproteobacteria Pasteurellales Pasteurellaceae Haemophilus                | <i>Haemophilus parainfluenzae</i>                                   | 98.75        |                        |

<sup>1</sup>Only ASVs shared in more than 3 mother-infant pairs in either foremilk or hindmilk at infant age 5 or 9 months were included

<sup>2</sup>Species level classification only adopted if top nBLAST hit showed 100% homology and second hit showed <100% homology, as marked with bold text

| <b>Table S6 - Genus level relative abundance in infant feces from infants of secretor vs non-secretor mothers at infant age 5 months</b> |                                                                                         |                                                                                                   |                            |                              |
|------------------------------------------------------------------------------------------------------------------------------------------|-----------------------------------------------------------------------------------------|---------------------------------------------------------------------------------------------------|----------------------------|------------------------------|
| <b>Genus<sup>1</sup></b>                                                                                                                 | <b>Average relative abundance in feces of infant from non-secretor mothers (%), n=5</b> | <b>Average relative abundance in feces of infants from secretor mothers (%), n=24<sup>2</sup></b> | <b>P-value<sup>3</sup></b> | <b>FDR corrected P-value</b> |
| <i>Bifidobacterium</i>                                                                                                                   | 81.131                                                                                  | 65.201                                                                                            | 0.518                      | 0.754                        |
| <i>Veillonella</i>                                                                                                                       | 0.494                                                                                   | 2.759                                                                                             | 0.204                      | 0.683                        |
| <i>Streptococcus</i>                                                                                                                     | 0.764                                                                                   | 2.455                                                                                             | 0.225                      | 0.683                        |
| <i>Enterococcus</i>                                                                                                                      | 2.258                                                                                   | 4.644                                                                                             | 0.419                      | 0.701                        |
| <i>Lactobacillus</i>                                                                                                                     | 0.440                                                                                   | 1.296                                                                                             | 0.578                      | 0.760                        |
| <i>Escherichia/Shigella</i>                                                                                                              | 1.234                                                                                   | 0.334                                                                                             | <b>0.030</b>               | 0.474                        |
| <i>Bacteroides</i>                                                                                                                       | 6.767                                                                                   | 11.513                                                                                            | 0.363                      | 0.701                        |
| <i>Clostridium sensu stricto</i>                                                                                                         | 0.137                                                                                   | 0.422                                                                                             | 0.299                      | 0.683                        |
| <i>Parabacteroides</i>                                                                                                                   | 1.132                                                                                   | 3.794                                                                                             | 0.282                      | 0.683                        |
| <i>Clostridiaceae uncl.</i>                                                                                                              | 0.001                                                                                   | 1.558                                                                                             | 0.208                      | 0.683                        |
| <i>Blautia</i>                                                                                                                           | 0.121                                                                                   | 1.113                                                                                             | 0.665                      | 0.760                        |
| <i>Collinsella</i>                                                                                                                       | 2.120                                                                                   | 1.041                                                                                             | 0.438                      | 0.701                        |
| <i>Klebsiella</i>                                                                                                                        | 0.038                                                                                   | 0.835                                                                                             | 0.895                      | 0.954                        |
| <i>Lachnospiraceae uncl.</i>                                                                                                             | 0.344                                                                                   | 0.703                                                                                             | 0.622                      | 0.760                        |
| <i>Anaerostipes</i>                                                                                                                      | 0.168                                                                                   | 0.194                                                                                             | 0.237                      | 0.683                        |
| <i>Clostridium_XVIII</i>                                                                                                                 | 0.056                                                                                   | 0.114                                                                                             | 0.967                      | 0.967                        |
| <sup>1</sup> Only taxa with average relative abundance > 0.2% across all samples were included                                           |                                                                                         |                                                                                                   |                            |                              |
| <sup>2</sup> One sample excluded due to maternal antibiotics during sampling                                                             |                                                                                         |                                                                                                   |                            |                              |
| <sup>3</sup> Statistical significance was evaluated by Mann Whitney tests                                                                |                                                                                         |                                                                                                   |                            |                              |

| Table S7 - ASV level relative abundance in infant feces from infants of secretor vs non-secretor mothers at infant age 5 months |                                                                                  |                                                                                             |                      |                       |                                                                                                       |                                                                                          |
|---------------------------------------------------------------------------------------------------------------------------------|----------------------------------------------------------------------------------|---------------------------------------------------------------------------------------------|----------------------|-----------------------|-------------------------------------------------------------------------------------------------------|------------------------------------------------------------------------------------------|
| ASV (assigned taxonomy) <sup>1</sup>                                                                                            | Average relative abundance in feces of infant from non-secretor mothers (%), n=5 | Average relative abundance in feces of infants from secretor mothers (%), n=24 <sup>2</sup> | P-value <sup>3</sup> | FDR corrected P-value | RDP taxonomy                                                                                          | nBLAST top hit against reference RNA sequence database at NCBI (% identity) <sup>4</sup> |
| ASV_40 ( <i>Bifidobacterium</i> spp.)                                                                                           | 0.001                                                                            | 2.637                                                                                       | 0.701                | 0.871                 | Bacteria_Actinobacteria_Actinobacteria_Bifidobacteriales_Bifidobacteriaceae_Bifidobacterium           | <i>B. breve</i> (98.63%)                                                                 |
| ASV_37 ( <i>Bifidobacterium catenulatum</i> group)                                                                              | 1.379                                                                            | 0.289                                                                                       | 0.442                | 0.871                 | Bacteria_Actinobacteria_Actinobacteria_Bifidobacteriales_Bifidobacteriaceae_Bifidobacterium           | <b><i>B. catenulatum</i> group (100%)</b>                                                |
| ASV_18 ( <i>Bifidobacterium bifidum</i> )                                                                                       | 0.936                                                                            | 2.191                                                                                       | 0.573                | 0.871                 | Bacteria_Actinobacteria_Actinobacteria_Bifidobacteriales_Bifidobacteriaceae_Bifidobacterium_bifidum   | <b><i>B. bifidum</i> (100%)</b>                                                          |
| ASV_17 ( <i>Bifidobacterium breve</i> )                                                                                         | 0.187                                                                            | 3.448                                                                                       | 0.327                | 0.871                 | Bacteria_Actinobacteria_Actinobacteria_Bifidobacteriales_Bifidobacteriaceae_Bifidobacterium_breve     | <b><i>B. breve</i> (100%)</b>                                                            |
| ASV_108 ( <i>Bifidobacterium</i> spp.)                                                                                          | 0.001                                                                            | 0.489                                                                                       | 1.000                | 1.000                 | Bacteria_Actinobacteria_Actinobacteria_Bifidobacteriales_Bifidobacteriaceae_Bifidobacterium_breve     | <i>B. scardovii</i> (99.30 %)                                                            |
| ASV_1 ( <i>Bifidobacterium longum</i> )                                                                                         | 77.673                                                                           | 49.428                                                                                      | 0.069                | 0.734                 | Bacteria_Actinobacteria_Actinobacteria_Bifidobacteriales_Bifidobacteriaceae_Bifidobacterium_longum    | <b><i>B. longum</i> (100%)</b>                                                           |
| ASV_7 ( <i>Bifidobacterium longum</i> )                                                                                         | 0.671                                                                            | 6.367                                                                                       | 0.602                | 0.871                 | Bacteria_Actinobacteria_Actinobacteria_Bifidobacteriales_Bifidobacteriaceae_Bifidobacterium_longum    | <b><i>B. longum</i> (100%)</b>                                                           |
| ASV_26 ( <i>Collinsella aerofaciens</i> )                                                                                       | 2.120                                                                            | 1.041                                                                                       | 0.438                | 0.871                 | Bacteria_Actinobacteria_Actinobacteria_Coribacteriales_Coribacteriaceae_Collinsella_aerofaciens       | <b><i>C. aerofaciens</i> (100%)</b>                                                      |
| ASV_98 ( <i>Bacteroides</i> spp.)                                                                                               | 0.084                                                                            | 0.494                                                                                       | 0.967                | 0.999                 | Bacteria_Bacteroidetes_Bacteroidia_Bacteroidales_Bacteroidaceae_Bacteroides                           | <i>B. xylanisolvans</i> (99.35%)                                                         |
| ASV_35 ( <i>Bacteroides</i> spp.)                                                                                               | 0.001                                                                            | 1.377                                                                                       | 0.459                | 0.871                 | Bacteria_Bacteroidetes_Bacteroidia_Bacteroidales_Bacteroidaceae_Bacteroides                           | <i>B. dorei</i> (98.71%)                                                                 |
| ASV_15 ( <i>Bacteroides vulgatus</i> )                                                                                          | 0.829                                                                            | 2.432                                                                                       | 0.442                | 0.871                 | Bacteria_Bacteroidetes_Bacteroidia_Bacteroidales_Bacteroidaceae_Bacteroides                           | <b><i>B. vulgatus</i> (100%)</b>                                                         |
| ASV_59 ( <i>Bacteroides</i> spp.)                                                                                               | 0.014                                                                            | 3.037                                                                                       | 0.188                | 0.871                 | Bacteria_Bacteroidetes_Bacteroidia_Bacteroidales_Bacteroidaceae_Bacteroides                           | <i>B. caccae/faecium</i> (99.35%)                                                        |
| ASV_86 ( <i>Bacteroides fragilis</i> )                                                                                          | 2.000                                                                            | 0.129                                                                                       | 0.096                | 0.766                 | Bacteria_Bacteroidetes_Bacteroidia_Bacteroidales_Bacteroidaceae_Bacteroides_fragilis                  | <b><i>B. fragilis</i> (100%)</b>                                                         |
| ASV_61 ( <i>Bacteroides thetaiotaomicron</i> )                                                                                  | 0.317                                                                            | 0.396                                                                                       | 0.665                | 0.871                 | Bacteria_Bacteroidetes_Bacteroidia_Bacteroidales_Bacteroidaceae_Bacteroides_thetaiotaomicron          | <b><i>B. thetaiotaomicron</i> (100%)</b>                                                 |
| ASV_70 ( <i>Bacteroides xylanisolvans</i> )                                                                                     | 0.001                                                                            | 0.396                                                                                       | 0.870                | 0.960                 | Bacteria_Bacteroidetes_Bacteroidia_Bacteroidales_Bacteroidaceae_Bacteroides_xylanisolvans             | <b><i>B. xylanisolvans</i> (100%)</b>                                                    |
| ASV_71 ( <i>Parabacteroides distasonis</i> )                                                                                    | 0.007                                                                            | 1.102                                                                                       | 0.665                | 0.871                 | Bacteria_Bacteroidetes_Bacteroidia_Bacteroidales_Porphyromonadaceae_Parabacteroides_distasonis        | <b><i>P. distasonis</i> (100%)</b>                                                       |
| ASV_39 ( <i>Enterococcus faecalis</i> )                                                                                         | 1.208                                                                            | 1.924                                                                                       | 0.707                | 0.871                 | Bacteria_Firmicutes_Bacilli_Lactobacillales_Enterococcaceae_Enterococcus                              | <b><i>E. faecalis</i> (100%)</b>                                                         |
| ASV_36 ( <i>Enterococcus faecium</i> group)                                                                                     | 1.012                                                                            | 2.558                                                                                       | 0.498                | 0.871                 | Bacteria_Firmicutes_Bacilli_Lactobacillales_Enterococcaceae_Enterococcus                              | <b><i>E. faecium</i> group (100%)</b>                                                    |
| ASV_46 ( <i>Lactobacillus casei</i> group)                                                                                      | 0.384                                                                            | 1.110                                                                                       | 0.423                | 0.871                 | Bacteria_Firmicutes_Bacilli_Lactobacillales_Lactobacillaceae_Lactobacillus                            | <b><i>L. casei</i> group (100%)</b>                                                      |
| ASV_12 ( <i>Streptococcus</i> spp.)                                                                                             | 0.132                                                                            | 0.488                                                                                       | 0.298                | 0.871                 | Bacteria_Firmicutes_Bacilli_Lactobacillales_Streptococcaceae_Streptococcus                            | <i>S. peroris/lactarius</i> (99.38%)                                                     |
| ASV_2 ( <i>Streptococcus mitis</i> group)                                                                                       | 0.066                                                                            | 0.667                                                                                       | <b>0.035</b>         | 0.560                 | Bacteria_Firmicutes_Bacilli_Lactobacillales_Streptococcaceae_Streptococcus                            | <b><i>S. mitis</i> group (100%)</b>                                                      |
| ASV_6 ( <i>Streptococcus salivarius</i> )                                                                                       | 0.418                                                                            | 0.926                                                                                       | 0.707                | 0.871                 | Bacteria_Firmicutes_Bacilli_Lactobacillales_Streptococcaceae_Streptococcus                            | <b><i>S. salivarius</i> (100%)</b>                                                       |
| ASV_50 ( <i>Clostridiaceae</i> spp.)                                                                                            | 0.001                                                                            | 1.408                                                                                       | 0.275                | 0.871                 | Bacteria_Firmicutes_Clostridia_Clostridiales_Clostridiaceae_1                                         | <i>D. massiliensis</i> (98.52%)                                                          |
| ASV_186 ( <i>Clostridium perfringens</i> )                                                                                      | 0.107                                                                            | 0.255                                                                                       | 0.622                | 0.871                 | Bacteria_Firmicutes_Clostridia_Clostridiales_Clostridiaceae_1_Clostridium_sensu_stricto               | <b><i>C. perfringens</i> (100%)</b>                                                      |
| ASV_34 ( <i>Ruminococcus gnavus</i> )                                                                                           | 0.299                                                                            | 0.620                                                                                       | 0.442                | 0.871                 | Bacteria_Firmicutes_Clostridia_Clostridiales_Lachnospiraceae                                          | <b><i>R. gnavus</i> (100%)</b>                                                           |
| ASV_73 ( <i>ClostridiumXVIII ramosum</i> )                                                                                      | 0.056                                                                            | 0.114                                                                                       | 0.967                | 0.999                 | Bacteria_Firmicutes_Erysipelotrichia_Erysipelotrichales_Erysipelotrichaceae_Clostridium_XVIII_ramosum | <b><i>E. ramosum</i> (100%)</b>                                                          |
| ASV_21 ( <i>Veillonella</i> spp.)                                                                                               | 0.322                                                                            | 1.229                                                                                       | 0.663                | 0.871                 | Bacteria_Firmicutes_Negativicutes_Selenomonadales_Veillonellaceae_Veillonella                         | <i>V. dispar</i> (99.83%)                                                                |
| ASV_11 ( <i>Veillonella dispar</i> )                                                                                            | 0.103                                                                            | 0.637                                                                                       | 0.225                | 0.871                 | Bacteria_Firmicutes_Negativicutes_Selenomonadales_Veillonellaceae_Veillonella                         | <b><i>V. dispar</i> (100%)</b>                                                           |
| ASV_42 ( <i>Veillonella atypica</i> )                                                                                           | 0.019                                                                            | 0.311                                                                                       | 0.349                | 0.871                 | Bacteria_Firmicutes_Negativicutes_Selenomonadales_Veillonellaceae_Veillonella                         | <b><i>V. atypica</i> (100%)</b>                                                          |
| ASV_13 ( <i>Escherichia/Shigella</i> spp.)                                                                                      | 0.864                                                                            | 0.298                                                                                       | <b>0.033</b>         | 0.560                 | Bacteria_Proteobacteria_Gammaproteobacteria_Enterobacteriales_Enterobacteriaceae_Escherichia/Shigella | <i>Escherichia/Shigella</i> spp. (100%)                                                  |
| ASV_77 ( <i>Klebsiella</i> spp.)                                                                                                | 0.030                                                                            | 0.377                                                                                       | 0.812                | 0.960                 | Bacteria_Proteobacteria_Gammaproteobacteria_Enterobacteriales_Enterobacteriaceae_Klebsiella           | <i>Klebsiella</i> spp. (100%)                                                            |
| ASV_63 ( <i>Klebsiella</i> spp.)                                                                                                | 0.006                                                                            | 0.188                                                                                       | 0.848                | 0.960                 | Bacteria_Proteobacteria_Gammaproteobacteria_Enterobacteriales_Enterobacteriaceae_Klebsiella           | <b><i>Klebsiella</i> spp. (99.38%)</b>                                                   |

<sup>1</sup>Only ASVs with average relative abundance >0.2% and prevalence >15% across all samples were included

<sup>2</sup>One sample excluded due to maternal antibiotics during sampling

<sup>3</sup>Statistical significance was evaluated by Mann Whitney tests

<sup>4</sup>Species level classification only adopted if top nBLAST hit showed 100% homology and second hit showed <100% homology, as marked with bold text

**Table S8 - Adonis tests assessing impact HMOs in breast milk on microbial community composition in infant feces at infant age 5 months (n=29<sup>#</sup>)**

| HMO category               | Weighted Unifrac |         |                       | Unweighted Unifrac |         |                       | Bray Curtis    |         |                       | Jaccard        |              |                       |
|----------------------------|------------------|---------|-----------------------|--------------------|---------|-----------------------|----------------|---------|-----------------------|----------------|--------------|-----------------------|
|                            | R <sup>2</sup>   | P-value | FDR-corrected P-value | R <sup>2</sup>     | P-value | FDR-corrected P-value | R <sup>2</sup> | P-value | FDR-corrected P-value | R <sup>2</sup> | P-value      | FDR-corrected P-value |
| Diversity index            | 0.026            | 0.474   | 0.758                 | 0.024              | 0.861   | 0.977                 | 0.031          | 0.525   | 0.871                 | 0.032          | 0.703        | 0.839                 |
| 2'FL (nmol/ml)             | 0.051            | 0.218   | 0.758                 | 0.039              | 0.316   | 0.789                 | 0.046          | 0.204   | 0.753                 | 0.039          | 0.263        | 0.839                 |
| 3FL (nmol/ml)              | 0.075            | 0.103   | 0.758                 | 0.043              | 0.214   | 0.789                 | 0.064          | 0.075   | 0.753                 | 0.041          | 0.154        | 0.839                 |
| LNnT (nmol/ml)             | 0.023            | 0.524   | 0.758                 | 0.026              | 0.778   | 0.964                 | 0.020          | 0.861   | 0.898                 | 0.034          | 0.571        | 0.839                 |
| 3'SL (nmol/ml)             | 0.038            | 0.313   | 0.758                 | 0.034              | 0.493   | 0.789                 | 0.025          | 0.726   | 0.871                 | 0.032          | 0.769        | 0.839                 |
| DFLac (nmol/ml)            | 0.036            | 0.352   | 0.758                 | 0.028              | 0.719   | 0.959                 | 0.041          | 0.307   | 0.819                 | 0.032          | 0.698        | 0.839                 |
| 6'SL (nmol/ml)             | 0.028            | 0.442   | 0.758                 | 0.049              | 0.120   | 0.789                 | 0.049          | 0.199   | 0.753                 | 0.041          | 0.175        | 0.839                 |
| LNT (nmol/ml)              | 0.030            | 0.411   | 0.758                 | 0.032              | 0.581   | 0.872                 | 0.028          | 0.615   | 0.871                 | 0.036          | 0.406        | 0.839                 |
| LNFP I (nmol/ml)           | 0.010            | 0.840   | 0.840                 | 0.037              | 0.380   | 0.789                 | 0.014          | 0.945   | 0.945                 | 0.033          | 0.705        | 0.839                 |
| LNFP II (nmol/ml)          | 0.017            | 0.645   | 0.840                 | 0.039              | 0.314   | 0.789                 | 0.023          | 0.800   | 0.898                 | 0.038          | 0.327        | 0.839                 |
| LNFP III (nmol/ml)         | 0.023            | 0.537   | 0.758                 | 0.016              | 0.993   | 0.993                 | 0.021          | 0.845   | 0.898                 | 0.033          | 0.623        | 0.839                 |
| LSTb (nmol/ml)             | 0.025            | 0.482   | 0.758                 | 0.046              | 0.161   | 0.789                 | 0.030          | 0.519   | 0.871                 | 0.036          | 0.447        | 0.839                 |
| LSTc (nmol/ml)             | 0.011            | 0.805   | 0.840                 | 0.037              | 0.450   | 0.789                 | 0.029          | 0.567   | 0.871                 | 0.047          | <b>0.038</b> | 0.456                 |
| DFLNT (nmol/ml)            | 0.013            | 0.746   | 0.840                 | 0.026              | 0.803   | 0.964                 | 0.025          | 0.718   | 0.871                 | 0.032          | 0.747        | 0.839                 |
| LNH (nmol/ml)              | 0.010            | 0.802   | 0.840                 | 0.021              | 0.921   | 0.977                 | 0.024          | 0.720   | 0.871                 | 0.031          | 0.819        | 0.855                 |
| DSLNT (nmol/ml)            | 0.054            | 0.198   | 0.758                 | 0.038              | 0.353   | 0.789                 | 0.043          | 0.241   | 0.753                 | 0.029          | 0.901        | 0.901                 |
| FLNH (nmol/ml)             | 0.025            | 0.472   | 0.758                 | 0.021              | 0.936   | 0.977                 | 0.030          | 0.538   | 0.871                 | 0.033          | 0.710        | 0.839                 |
| DFLNH (nmol/ml)            | 0.009            | 0.819   | 0.840                 | 0.046              | 0.159   | 0.789                 | 0.022          | 0.700   | 0.871                 | 0.035          | 0.522        | 0.839                 |
| FDSLNH (nmol/ml)           | 0.014            | 0.694   | 0.840                 | 0.039              | 0.337   | 0.789                 | 0.026          | 0.656   | 0.871                 | 0.049          | <b>0.014</b> | 0.336                 |
| DSLNH (nmol/ml)            | 0.033            | 0.336   | 0.758                 | 0.031              | 0.658   | 0.929                 | 0.049          | 0.251   | 0.753                 | 0.039          | 0.240        | 0.839                 |
| Total HMOs (nmol/ml)       | 0.047            | 0.236   | 0.758                 | 0.037              | 0.400   | 0.789                 | 0.045          | 0.202   | 0.753                 | 0.036          | 0.401        | 0.839                 |
| Sialylated HMOs (nmol/ml)  | 0.030            | 0.403   | 0.758                 | 0.045              | 0.181   | 0.789                 | 0.029          | 0.608   | 0.871                 | 0.040          | 0.186        | 0.839                 |
| Fucosylated HMOs (nmol/ml) | 0.043            | 0.294   | 0.758                 | 0.035              | 0.475   | 0.789                 | 0.043          | 0.230   | 0.753                 | 0.036          | 0.450        | 0.839                 |

<sup>#</sup>One sample excluded due to maternal antibiotics during sampling



**Table S9 - Correlations between HMOs in breast milk and relative abundance of genus level taxa in infant feces at infant age 5 months (n=29)**

| Genus <sup>1</sup>               | Correlation coefficient |               |               |                |                |                 |                |               |                  |                   |                    |                |                |                 |               |                 |                |                 |                  | Total HMOs (nmol/ml) | Sialylated HMOs (nmol/ml) | Fucosylated HMOs (nmol/ml) |                 |
|----------------------------------|-------------------------|---------------|---------------|----------------|----------------|-----------------|----------------|---------------|------------------|-------------------|--------------------|----------------|----------------|-----------------|---------------|-----------------|----------------|-----------------|------------------|----------------------|---------------------------|----------------------------|-----------------|
|                                  | Diversity index         | 2FL (nmol/ml) | 3FL (nmol/ml) | LNnT (nmol/ml) | 3'SL (nmol/ml) | DFLac (nmol/ml) | 6'SL (nmol/ml) | LNT (nmol/ml) | LNFP I (nmol/ml) | LNFP II (nmol/ml) | LNFP III (nmol/ml) | LSTb (nmol/ml) | LSTc (nmol/ml) | DFLNT (nmol/ml) | LNH (nmol/ml) | DSLNT (nmol/ml) | FLNH (nmol/ml) | DFLNH (nmol/ml) | FDSLNH (nmol/ml) |                      |                           |                            | DSLNH (nmol/ml) |
| <i>Enterococcus</i>              | -0.2261                 | 0.3020        | 0.2562        | -0.2234        | 0.1909         | 0.1485          | -0.0323        | -0.3321       | 0.1126           | -0.2976           | -0.0259            | -0.3813        | 0.2473         | -0.1630         | -0.0399       | -0.3284         | -0.0643        | 0.2340          | -0.0692          | -0.0015              | 0.2399                    | -0.1387                    | 0.2739          |
| <i>Clostridiaceae uncl.</i>      | -0.0866                 | 0.2250        | 0.2283        | -0.0331        | 0.1991         | 0.2415          | -0.1066        | -0.2338       | 0.0976           | -0.1704           | -0.1197            | -0.0733        | 0.2404         | 0.1464          | -0.0248       | -0.1346         | -0.3446        | -0.2007         | -0.0728          | -0.2156              | -0.0778                   | 0.2233                     |                 |
| <i>Streptococcus</i>             | -0.1315                 | 0.1638        | 0.1806        | -0.1663        | 0.1345         | 0.3160          | -0.2099        | 0.0140        | 0.0618           | -0.1742           | 0.0143             | -0.0185        | -0.0616        | 0.2222          | -0.0119       | 0.1742          | 0.1104         | -0.2461         | -0.3200          | -0.1478              | 0.2249                    | -0.0298                    | 0.2094          |
| <i>Clostridium sensu stricto</i> | -0.4781                 | 0.2332        | 0.0946        | -0.1695        | -0.0228        | -0.0426         | 0.0646         | -0.1936       | -0.0907          | -0.0066           | -0.1297            | 0.0124         | 0.1153         | -0.3378         | -0.1645       | -0.1221         | -0.2065        | 0.1703          | 0.1178           | 0.2673               | 0.2278                    | -0.0545                    | 0.1994          |
| <i>Clostridium_XVIII</i>         | 0.2156                  | -0.1656       | -0.0376       | 0.0334         | 0.2657         | 0.0828          | 0.1266         | 0.0209        | -0.1489          | 0.2184            | -0.0035            | 0.1301         | -0.0675        | 0.4369          | 0.3945        | 0.0897          | 0.3742         | -0.4090         | 0.3179           | 0.1106               | -0.1830                   | 0.3346                     | -0.0765         |
| <i>Veillonella</i>               | -0.2618                 | 0.1872        | -0.0850       | -0.1747        | -0.0150        | 0.1020          | -0.1187        | 0.0384        | 0.2878           | -0.3153           | -0.4634            | -0.1013        | -0.1954        | 0.3228          | 0.0274        | -0.1540         | 0.0828         | 0.1057          | -0.3235          | -0.3671              | 0.1732                    | -0.2631                    | 0.2092          |
| <i>Blautia</i>                   | 0.0164                  | -0.0830       | -0.0986       | 0.0107         | 0.1142         | -0.0591         | -0.0797        | 0.0871        | -0.0772          | 0.0435            | 0.0337             | 0.1709         | -0.0353        | 0.0649          | -0.0748       | 0.1093          | 0.0895         | -0.1684         | -0.0238          | -0.2013              | -0.0427                   | 0.0468                     | -0.0427         |
| <i>Bacteroides</i>               | 0.3302                  | -0.2837       | -0.1051       | 0.0260         | 0.0400         | 0.0135          | 0.1186         | 0.0816        | -0.2427          | 0.3987            | 0.2977             | 0.3792         | -0.2527        | -0.0951         | 0.0615        | 0.2376          | -0.0886        | -0.0110         | 0.3152           | 0.0861               | -0.2246                   | 0.4178                     | -0.2216         |
| <i>Bifidobacterium</i>           | -0.0591                 | -0.1039       | -0.1626       | 0.2680         | -0.3276        | -0.2808         | 0.1857         | 0.1828        | 0.0759           | -0.0502           | -0.0749            | 0.0833         | 0.0552         | -0.0182         | -0.1345       | 0.3133          | -0.0010        | 0.0325          | -0.1207          | 0.0517               | -0.1310                   | -0.1300                    | -0.1970         |
| <i>Lachnospiraceae uncl.</i>     | 0.3698                  | -0.3088       | -0.1769       | -0.0925        | 0.1634         | -0.0886         | 0.0664         | 0.0198        | -0.2181          | 0.2136            | -0.0727            | 0.0553         | -0.1754        | 0.2013          | 0.2608        | -0.1000         | 0.2764         | 0.0072          | 0.3608           | 0.0991               | -0.3200                   | 0.2563                     | -0.2325         |
| <i>Klebsiella</i>                | -0.1073                 | 0.0212        | -0.1883       | -0.1429        | -0.3052        | -0.1993         | -0.0839        | 0.3230        | 0.2329           | -0.2016           | -0.0037            | 0.1169         | -0.3168        | -0.0583         | -0.2780       | 0.3394          | 0.0957         | 0.3478          | -0.3515          | -0.3995              | 0.0426                    | -0.2112                    | -0.0418         |
| <i>Anaerostipes</i>              | 0.2282                  | -0.2623       | -0.2219       | 0.0452         | -0.0104        | -0.1864         | 0.1030         | 0.0946        | -0.2045          | 0.2247            | 0.1468             | 0.2588         | -0.0438        | 0.0529          | 0.1823        | 0.1663          | 0.2769         | -0.0654         | 0.3443           | 0.0480               | -0.2713                   | 0.2261                     | -0.2490         |
| <i>Lactobacillus</i>             | 0.1830                  | -0.1938       | -0.2451       | -0.0763        | 0.1433         | -0.0418         | 0.3198         | 0.0803        | -0.1888          | 0.1225            | -0.0453            | -0.1098        | -0.1158        | 0.2646          | 0.2648        | -0.3001         | 0.3973         | 0.0148          | 0.3238           | 0.3113               | -0.2188                   | 0.1420                     | -0.0645         |
| <i>Parabacteroides</i>           | 0.1260                  | -0.1604       | -0.2857       | 0.2277         | -0.0889        | -0.2145         | 0.2368         | 0.1643        | -0.0203          | 0.1657            | -0.0030            | 0.0597         | -0.0249        | 0.1020          | 0.0226        | -0.1306         | 0.1643         | 0.0400          | -0.1306          | 0.1643               | 0.0400                    | -0.1670                    | -0.1516         |
| <i>Collinsella</i>               | 0.2745                  | -0.2819       | -0.3156       | 0.1893         | 0.0659         | -0.1590         | 0.3596         | 0.3296        | -0.1463          | 0.1835            | 0.1262             | 0.3056         | -0.1281        | 0.3925          | 0.1980        | 0.1995          | 0.2883         | -0.2778         | 0.1607           | 0.1375               | -0.3506                   | 0.3062                     | -0.2896         |
| <i>Escherichia/Shigella</i>      | 0.2920                  | -0.4595       | -0.4429       | 0.3954         | -0.3489        | -0.3474         | 0.5758         | 0.4699        | -0.2623          | 0.2596            | 0.0829             | 0.4125         | -0.0836        | -0.0981         | -0.1330       | 0.3375          | -0.0280        | 0.1111          | 0.0678           | 0.3566               | -0.4454                   | 0.3960                     | -0.5090         |

  

| Genus <sup>1</sup>               | P-values <sup>2</sup> |               |               |                |                |                 |                |               |                  |                   |                    |                |                |                 |               |                 |                |                 |                  | Total HMOs (nmol/ml) | Sialylated HMOs (nmol/ml) | Fucosylated HMOs (nmol/ml) |                 |
|----------------------------------|-----------------------|---------------|---------------|----------------|----------------|-----------------|----------------|---------------|------------------|-------------------|--------------------|----------------|----------------|-----------------|---------------|-----------------|----------------|-----------------|------------------|----------------------|---------------------------|----------------------------|-----------------|
|                                  | Diversity index       | 2FL (nmol/ml) | 3FL (nmol/ml) | LNnT (nmol/ml) | 3'SL (nmol/ml) | DFLac (nmol/ml) | 6'SL (nmol/ml) | LNT (nmol/ml) | LNFP I (nmol/ml) | LNFP II (nmol/ml) | LNFP III (nmol/ml) | LSTb (nmol/ml) | LSTc (nmol/ml) | DFLNT (nmol/ml) | LNH (nmol/ml) | DSLNT (nmol/ml) | FLNH (nmol/ml) | DFLNH (nmol/ml) | FDSLNH (nmol/ml) |                      |                           |                            | DSLNH (nmol/ml) |
| <i>Enterococcus</i>              | 0.2382                | 0.1113        | 0.1798        | 0.2440         | 0.3212         | 0.4419          | 0.8680         | 0.0724        | 0.5610           | 0.1169            | 0.8940             | 0.0412         | 0.1958         | 0.3983          | 0.8371        | 0.0820          | 0.7404         | 0.2218          | 0.7212           | 0.9939               | 0.2100                    | 0.4731                     | 0.1505          |
| <i>Clostridiaceae uncl.</i>      | 0.6552                | 0.2406        | 0.2336        | 0.8647         | 0.3005         | 0.2069          | 0.5748         | 0.2282        | 0.6145           | 0.3768            | 0.5364             | 0.0208         | 0.2090         | 0.4485          | 0.8983        | 0.5195          | 0.4883         | 0.0671          | 0.2965           | 0.7075               | 0.2613                    | 0.6885                     | 0.2442          |
| <i>Streptococcus</i>             | 0.4964                | 0.3958        | 0.3486        | 0.3887         | 0.4867         | 0.0949          | 0.2745         | 0.9424        | 0.7500           | 0.3662            | 0.9414             | 0.9242         | 0.7510         | 0.2466          | 0.9509        | 0.3662          | 0.5687         | 0.1982          | 0.0906           | 0.4442               | 0.2408                    | 0.8780                     | 0.2757          |
| <i>Clostridium sensu stricto</i> | 0.0087                | 0.2445        | 0.6625        | 0.3823         | 0.9065         | 0.8265          | 0.7392         | 0.3144        | 0.6398           | 0.9729            | 0.5024             | 0.9490         | 0.5515         | 0.0731          | 0.3940        | 0.5280          | 0.2825         | 0.3772          | 0.5427           | 0.1610               | 0.2347                    | 0.7790                     | 0.3022          |
| <i>Clostridium_XVIII</i>         | 0.2612                | 0.3907        | 0.8466        | 0.8635         | 0.1635         | 0.6694          | 0.5128         | 0.9144        | 0.4409           | 0.2550            | 0.9857             | 0.5012         | 0.7280         | 0.0178          | 0.0342        | 0.6434          | 0.0455         | 0.0276          | 0.0928           | 0.5679               | 0.3421                    | 0.0760                     | 0.6932          |
| <i>Veillonella</i>               | 0.7500                | 0.3308        | 0.6611        | 0.3648         | 0.9383         | 0.5986          | 0.5395         | 0.8431        | 0.1301           | 0.0956            | 0.0113             | 0.6012         | 0.3098         | 0.0877          | 0.8880        | 0.4252          | 0.6934         | 0.5853          | 0.0869           | 0.0501               | 0.3689                    | 0.0528                     | 0.2762          |
| <i>Blautia</i>                   | 0.9326                | 0.6687        | 0.6109        | 0.9562         | 0.5553         | 0.7605          | 0.6812         | 0.6533        | 0.6905           | 0.8226            | 0.8623             | 0.3755         | 0.8557         | 0.7380          | 0.6999        | 0.5726          | 0.6441         | 0.3625          | 0.9024           | 0.2951               | 0.8259                    | 0.8094                     | 0.8259          |
| <i>Bacteroides</i>               | 0.8002                | 0.1359        | 0.5875        | 0.8934         | 0.8367         | 0.9446          | 0.5401         | 0.6741        | 0.2047           | 0.0321            | 0.1168             | 0.0425         | 0.1981         | 0.6237          | 0.7511        | 0.2145          | 0.6478         | 0.9548          | 0.0958           | 0.6571               | 0.2414                    | 0.0241                     | 0.2479          |
| <i>Bifidobacterium</i>           | 0.7607                | 0.5916        | 0.3995        | 0.1599         | 0.0628         | 0.1401          | 0.3348         | 0.3427        | 0.6887           | 0.7959            | 0.8995             | 0.6677         | 0.7762         | 0.3252          | 0.4867        | 0.0979          | 0.9860         | 0.8670          | 0.5329           | 0.7899               | 0.4681                    | 0.5013                     | 0.3056          |
| <i>Lachnospiraceae uncl.</i>     | 0.0483                | 0.1031        | 0.3585        | 0.6331         | 0.3969         | 0.6475          | 0.7322         | 0.9187        | 0.2557           | 0.2659            | 0.7078             | 0.7758         | 0.3626         | 0.2950          | 0.1718        | 0.6056          | 0.1467         | 0.9704          | 0.0545           | 0.6089               | 0.0906                    | 0.1796                     | 0.2248          |
| <i>Klebsiella</i>                | 0.5796                | 0.9132        | 0.3279        | 0.4597         | 0.1074         | 0.2999          | 0.6654         | 0.0675        | 0.2240           | 0.2944            | 0.9849             | 0.5460         | 0.0941         | 0.7638          | 0.1443        | 0.0717          | 0.6214         | 0.0645          | 0.0615           | 0.0318               | 0.8262                    | 0.2715                     | 0.8296          |
| <i>Anaerostipes</i>              | 0.2339                | 0.1693        | 0.2473        | 0.8158         | 0.9572         | 0.3329          | 0.5951         | 0.6254        | 0.2872           | 0.2413            | 0.4474             | 0.1753         | 0.8214         | 0.7853          | 0.3440        | 0.3887          | 0.1460         | 0.7361          | 0.0674           | 0.8047               | 0.1546                    | 0.2383                     | 0.1927          |
| <i>Lactobacillus</i>             | 0.3419                | 0.3138        | 0.2001        | 0.6942         | 0.4584         | 0.8297          | 0.0908         | 0.6789        | 0.3267           | 0.5266            | 0.8157             | 0.5708         | 0.5498         | 0.1654          | 0.1650        | 0.1138          | 0.0328         | 0.9395          | 0.0866           | 0.1002               | 0.2541                    | 0.4624                     | 0.7395          |
| <i>Parabacteroides</i>           | 0.5150                | 0.4058        | 0.1330        | 0.2350         | 0.6465         | 0.2638          | 0.2161         | 0.3943        | 0.7726           | 0.4846            | 0.9166             | 0.3905         | 0.9879         | 0.7583          | 0.8978        | 0.5985          | 0.9072         | 0.4997          | 0.3943           | 0.8367               | 0.3867                    | 0.5128                     | 0.4326          |
| <i>Collinsella</i>               | 0.1496                | 0.1384        | 0.0954        | 0.3253         | 0.7343         | 0.4100          | 0.0553         | 0.0808        | 0.4488           | 0.3406            | 0.5141             | 0.1069         | 0.5077         | 0.0352          | 0.3031        | 0.2994          | 0.1294         | 0.1445          | 0.4051           | 0.4768               | 0.0623                    | 0.1062                     | 0.1275          |
| <i>Escherichia/Shigella</i>      | 0.1243                | 0.0122        | 0.0161        | 0.0338         | 0.0636         | 0.0648          | 0.0011         | 0.0101        | 0.1693           | 0.1739            | 0.6690             | 0.0262         | 0.6662         | 0.6126          | 0.4915        | 0.0734          | 0.8855         | 0.5661          | 0.7268           | 0.0576               | 0.0155                    | 0.6095                     | 0.0048          |

  

| Genus <sup>1</sup>               | FDR corrected P-values <sup>3</sup> |               |               |                |                |                 |                |               |                  |                   |                    |                |                |                 |               |                 |                |                 |                  | Total HMOs (nmol/ml) | Sialylated HMOs (nmol/ml) | Fucosylated HMOs (nmol/ml) |                 |
|----------------------------------|-------------------------------------|---------------|---------------|----------------|----------------|-----------------|----------------|---------------|------------------|-------------------|--------------------|----------------|----------------|-----------------|---------------|-----------------|----------------|-----------------|------------------|----------------------|---------------------------|----------------------------|-----------------|
|                                  | Diversity index                     | 2FL (nmol/ml) | 3FL (nmol/ml) | LNnT (nmol/ml) | 3'SL (nmol/ml) | DFLac (nmol/ml) | 6'SL (nmol/ml) | LNT (nmol/ml) | LNFP I (nmol/ml) | LNFP II (nmol/ml) | LNFP III (nmol/ml) | LSTb (nmol/ml) | LSTc (nmol/ml) | DFLNT (nmol/ml) | LNH (nmol/ml) | DSLNT (nmol/ml) | FLNH (nmol/ml) | DFLNH (nmol/ml) | FDSLNH (nmol/ml) |                      |                           |                            | DSLNH (nmol/ml) |
| <i>Enterococcus</i>              | 0.5225                              | 0.4429        | 0.5653        | 0.7773         | 0.8565         | 0.7856          | 0.8690         | 0.3498        | 0.7726           | 0.5481            | 0.9857             | 0.2265         | 0.8360         | 0.7966          | 0.9509        | 0.3640          | 0.9112         | 0.5914          | 0.7752           | 0.9939               | 0.4181                    | 0.7459                     | 0.4445          |
| <i>Clostridiaceae uncl.</i>      | 0.8064                              | 0.4889        | 0.5653        | 0.9530         | 0.8555         | 0.7609          | 0.7884         | 0.7110        | 0.7726           | 0.5481            | 0.9857             | 0.8681         | 0.8360         | 0.7973          | 0.9509        | 0.6434          | 0.8926         | 0.3580          | 0.5270           | 0.8925               | 0.4181                    | 0.8474                     | 0.4445          |
| <i>Streptococcus</i>             | 0.7491                              | 0.4995        | 0.5736        | 0.7773         | 0.8652         | 0.7472          | 0.7884         | 0.9424        | 0.7726           | 0.5481            | 0.9857             | 0.9490         | 0.9127         | 0.6576          | 0.9509        | 0.6434          | 0.8926         | 0.5914          | 0.1916           | 0.8925               | 0.4181                    | 0.8780                     | 0.4445          |
| <i>Clostridium sensu stricto</i> | 0.1394                              | 0.4889        | 0.7067        | 0.7773         | 0.9572         | 0.8850          | 0.7884         | 0.7832        | 0.7726           | 0.9729            | 0.9857             | 0.9490         | 0.9127         | 0.3507          | 0.8739        | 0.6434          | 0.7534         | 0.7651          | 0.6680           | 0.5151               | 0.4181                    | 0.8634                     | 0.4445          |
| <i>Clostridium_XVIII</i>         | 0.5225                              | 0.4995        | 0.8466        | 0.9530         | 0.6542         | 0.8850          | 0.7884         | 0.9424        | 0.7726           | 0.5481            | 0.9857             | 0.8681         | 0.9127         | 0.2816          | 0.5474        | 0.6434          | 0.3639         | 0.3580          | 0.1916           | 0.8925               | 0.4759                    | 0.4055                     | 0.8296          |
| <i>Veillonella</i>               | 0.8114                              | 0.4995        | 0.7067        | 0.7773         | 0.9572         | 0.8850          | 0.7884         | 0.9424        | 0.7467           | 0.5481            | 0.1816             | 0.             |                |                 |               |                 |                |                 |                  |                      |                           |                            |                 |

**Table S50 - Correlations between HMOs in breast milk and relative abundance of ASV level taxa in infant feces at infant age 5 months (n=29)**

| ASV (Assigned taxonomy) <sup>a</sup>       | Diversity index | Correlation coefficient |               |                |               |                 |               |               |                  |                   |                    |                |                |                 |               |                 |                |                 | Total HMOs (nmol/ml) | Sialylate HMOs (nmol/ml) | Fucosylate HMOs (nmol/ml) |                  |                  |
|--------------------------------------------|-----------------|-------------------------|---------------|----------------|---------------|-----------------|---------------|---------------|------------------|-------------------|--------------------|----------------|----------------|-----------------|---------------|-----------------|----------------|-----------------|----------------------|--------------------------|---------------------------|------------------|------------------|
|                                            |                 | 2FL (nmol/ml)           | 3FL (nmol/ml) | LNnT (nmol/ml) | 3SL (nmol/ml) | DfLac (nmol/ml) | 6SL (nmol/ml) | LNT (nmol/ml) | LNFP I (nmol/ml) | LNFP II (nmol/ml) | LNFP III (nmol/ml) | LSTb (nmol/ml) | LSTc (nmol/ml) | DfLNT (nmol/ml) | LNH (nmol/ml) | DSLNT (nmol/ml) | FLNH (nmol/ml) | DFLNH (nmol/ml) |                      |                          |                           | FDSLNH (nmol/ml) | DSLNIH (nmol/ml) |
| ASV_1 (Bifidobacterium longum)             | 0.0271          | -0.2671                 | -0.3376       | 0.3016         | -0.3411       | -0.4460         | 0.3667        | 0.2721        | -0.1089          | 0.1301            | -0.0813            | 0.1671         | 0.0695         | -0.0394         | 0.0032        | 0.2814          | 0.0798         | 0.1089          | 0.1410               | 0.3207                   | -0.2982                   | 0.0453           | -0.3351          |
| ASV_108 (Bifidobacterium spp.)             | -0.2002         | 0.1093                  | 0.1242        | -0.0483        | 0.2066        | -0.1766         | -0.2025       | -0.0999       | -0.1138          | -0.2022           | -0.2477            | -0.0434        | -0.0666        | -0.0184         | -0.1183       | -0.1811         | -0.2798        | -0.0518         | -0.0277              | 0.4706                   | -0.1407                   | -0.0741          | -0.1343          |
| ASV_11 (Veillonella dispar)                | 0.0686          | 0.1236                  | 0.1362        | -0.2768        | 0.2040        | 0.2770          | -0.2324       | -0.1526       | 0.1110           | 0.1716            | -0.2299            | -0.1347        | -0.1320        | 0.1874          | 0.1151        | 0.2682          | 0.0464         | 0.0391          | 0.1152               | -0.2698                  | 0.2375                    | -0.2124          | 0.1919           |
| ASV_12 (Streptococcus spp.)                | -0.0308         | 0.0988                  | 0.2541        | -0.2058        | 0.1526        | 0.2314          | -0.1318       | -0.0510       | 0.0106           | -0.1720           | 0.0481             | -0.1279        | -0.0035        | -0.1272         | -0.0118       | 0.1188          | 0.2437         | -0.1831         | -0.2033              | -0.0601                  | -0.1434                   | 0.0596           | 0.1067           |
| ASV_13 (Escherichia/Shigella spp.)         | 0.3271          | -0.4717                 | -0.4538       | 0.4110         | -0.3719       | -0.3540         | 0.5997        | 0.4804        | -0.2056          | 0.2640            | -0.1167            | -0.0868        | -0.1167        | -0.0868         | -0.1373       | 0.3530          | -0.0457        | 0.1148          | 0.0961               | 0.3443                   | -0.4646                   | -0.1187          | -0.5380          |
| ASV_15 (Bacteroides vulgatus)              | 0.2383          | -0.2842                 | -0.1748       | -0.0844        | -0.0216       | 0.1388          | -0.0388       | 0.1851        | -0.2487          | 0.3562            | 0.4694             | 0.3734         | -0.4193        | -0.0895         | 0.0003        | 0.2326          | 0.1291         | -0.0522         | 0.3299               | 0.0478                   | -0.4555                   | 0.9693           | -0.1939          |
| ASV_17 (Bifidobacterium breve)             | 0.1288          | -0.0103                 | 0.9323        | -0.1091        | 0.1917        | 0.1333          | -0.1070       | -0.1720       | 0.2103           | -0.1674           | 0.0748             | -0.2989        | 0.2767         | 0.0699          | -0.0165       | -0.1801         | -0.0759        | -0.0961         | 0.1058               | 0.0003                   | 0.0545                    | 0.0202           | -0.0022          |
| ASV_18 (Bifidobacterium bifidum)           | 0.1120          | -0.0205                 | 0.0938        | 0.2129         | 0.0227        | 0.0209          | 0.0294        | -0.1864       | 0.4149           | -0.1155           | -0.1145            | -0.1551        | 0.2154         | 0.1622          | 0.1029        | 0.0466          | -0.1054        | -0.0522         | 0.0710               | -0.0375                  | -0.0613                   | -0.0667          | -0.0867          |
| ASV_186 (Bacteroides perfringens)          | -0.3138         | 0.0916                  | 0.0433        | -0.1763        | -0.0378       | 0.1442          | -0.0552       | 0.0120        | -0.2307          | 0.0607            | -0.0147            | 0.0742         | -0.1754        | -0.2217         | -0.1245       | 0.0144          | -0.1658        | 0.1871          | 0.1072               | -0.1793                  | 0.2037                    | -0.1032          | 0.1724           |
| ASV_2 (Streptococcus mitis group)          | -0.2509         | 0.3571                  | 0.3125        | -0.2627        | 0.0922        | 0.3295          | -0.3310       | -0.1397       | -0.1245          | -0.3738           | -0.0614            | -0.2585        | 0.0747         | 0.1531          | 0.0398        | -0.0416         | -0.2597        | 0.0062          | 0.3172               | 0.1322                   | 0.3988                    | -0.2181          | 0.3046           |
| ASV_21 (Veillonella spp.)                  | -0.0129         | 0.0878                  | -0.0467       | -0.1618        | -0.1037       | -0.1092         | 0.0948        | 0.0710        | 0.1921           | -0.2784           | 0.4288             | -0.1901        | -0.1285        | 0.0630          | -0.1276       | -0.2109         | 0.0417         | 0.2878          | -0.2432              | -0.1828                  | 0.0690                    | 0.3380           | 0.0531           |
| ASV_26 (Collinsella aerofaciens)           | 0.2745          | -0.2819                 | -0.3156       | 0.1893         | 0.0952        | -0.1590         | 0.3958        | 0.2396        | -0.1463          | 0.1635            | 0.1202             | 0.3956         | -0.1281        | 0.3958          | 0.1390        | 0.1695          | 0.2692         | -0.2778         | 0.1007               | 0.1375                   | -0.3506                   | 0.3392           | -0.2658          |
| ASV_34 (Ruminococcus granosus)             | 0.4184          | -0.3662                 | -0.1204       | -0.0191        | 0.1738        | -0.1038         | 0.1029        | -0.0529       | -0.2484          | 0.2911            | -0.0050            | 0.0894         | 0.0894         | 0.2790          | -0.1254       | 0.2011          | 0.0005         | 0.0894          | 0.2790               | -0.1254                  | 0.2011                    | 0.0005           | 0.0894           |
| ASV_35 (Bacteroides spp.)                  | 0.0679          | 0.0694                  | 0.0472        | 0.1091         | 0.2765        | 0.2426          | 0.1232        | -0.0682       | -0.0494          | 0.1208            | -0.0268            | -0.0941        | 0.2062         | 0.3725          | 0.4104        | -0.2128         | -0.2272        | -0.4124         | 0.2696               | 0.2940                   | 0.0760                    | 0.1623           | 0.1936           |
| ASV_36 (Bacteroides faecium group)         | -0.1673         | 0.2334                  | 0.1549        | -0.3288        | 0.2841        | 0.2907          | 0.2041        | -0.2825       | 0.0320           | -0.1320           | -0.2282            | -0.2885        | 0.1406         | -0.0482         | 0.0648        | -0.0893         | -0.1102        | 0.7733          | -0.0050              | 0.2946                   | 0.0152                    | 0.0309           | 0.2887           |
| ASV_37 (Bifidobacterium catenulatum group) | 0.0410          | -0.1038                 | -0.3127       | 0.2101         | -0.0816       | -0.1804         | 0.1923        | 0.1504        | -0.0047          | 0.0350            | -0.1482            | 0.1714         | 0.0810         | 0.0638          | 0.0016        | 0.2597          | 0.1723         | -0.0260         | 0.0313               | -0.0219                  | -0.0447                   | 0.0582           | -0.1044          |
| ASV_40 (Bifidobacterium spp.)              | 0.0656          | -0.0335                 | 0.3002        | -0.2933        | 0.4101        | 0.3330          | -0.0390       | -0.2487       | 0.2717           | 0.1116            | 0.2602             | -0.2090        | 0.0604         | 0.0947          | 0.0817        | -0.0892         | 0.1621         | -0.2217         | 0.1890               | 0.2743                   | 0.0517                    | 0.3693           | 0.3788           |
| ASV_42 (Lactobacillus spp.)                | -0.1053         | 0.1577                  | -0.0342       | 0.1224         | -0.0761       | -0.0287         | -0.0485       | -0.0551       | 0.2079           | -0.2528           | 0.2917             | -0.1847        | 0.3397         | 0.3259          | 0.1015        | -0.0722         | 0.1202         | -0.1577         | 0.3263               | -0.3003                  | 0.1610                    | 0.3242           | 0.1858           |
| ASV_46 (Veillonella casei group)           | 0.2548          | -0.2735                 | -0.3444       | -0.0172        | 0.0633        | -0.0998         | 0.4052        | 0.1864        | -0.2296          | 0.1975            | 0.1016             | 0.0213         | -0.1783        | 0.2477          | 0.2541        | -0.1697         | 0.4302         | -0.2123         | 0.3839               | -0.3030                  | -0.3014                   | 0.1981           | -0.1161          |
| ASV_50 (Clostridium spp.)                  | -0.0472         | 0.1961                  | 0.2533        | -0.1042        | 0.2299        | 0.2390          | -0.1829       | 0.2839        | 0.0607           | -0.1120           | -0.0486            | 0.0624         | 0.1628         | 0.0973          | -0.0483       | 0.1350          | -0.1760        | -0.2499         | -0.1432              | -0.0983                  | 0.1780                    | -0.0276          | 0.2065           |
| ASV_59 (Bacteroides spp.)                  | 0.2712          | -0.2938                 | -0.3686       | 0.2970         | -0.2069       | 0.2480          | 0.1852        | 0.3917        | -0.0550          | 0.2144            | 0.1137             | 0.4656         | -0.2428        | 0.0501          | -0.1287       | 0.4003          | -0.2666        | 0.0771          | 0.0168               | -0.0991                  | -0.2794                   | -0.1461          | -0.3811          |
| ASV_5 (Streptococcus salivarius)           | 0.0374          | -0.0515                 | -0.0411       | 0.0118         | 0.0803        | 0.1904          | -0.0079       | 0.1840        | -0.0368          | 0.0133            | 0.0645             | 0.1922         | -0.1404        | 0.2969          | 0.0678        | -0.2156         | 0.0668         | -0.1838         | -0.1012              | 0.0064                   | 0.0621                    | 0.0101           | 0.2005           |
| ASV_61 (Bacteroides thetaioacetum)         | 0.2834          | -0.2144                 | -0.0370       | -0.0403        | 0.2119        | 0.1314          | -0.0123       | -0.0657       | -0.2456          | 0.3015            | 0.1043             | 0.2045         | -0.3138        | -0.1847         | 0.0679        | -0.1725         | -0.1947        | 0.2982          | 0.0663               | -0.0277                  | 0.4066                    | -0.1629          | -0.0538          |
| ASV_63 (Klebsiella spp.)                   | -0.1345         | 0.1107                  | -0.0882       | -0.2139        | -0.1698       | -0.1404         | -0.1598       | 0.1933        | 0.1663           | -0.1775           | 0.0430             | -0.0338        | -0.1630        | -0.0623         | -0.1553       | 0.1657          | 0.2441         | 0.2204          | -0.1488              | -0.2004                  | 0.1210                    | -0.1312          | 0.0929           |
| ASV_73 (Bifidobacterium longum)            | 0.1224          | -0.0779                 | -0.1864       | 0.0922         | 0.0291        | 0.0594          | 0.0988        | 0.0272        | 0.0655           | 0.1417            | 0.1709             | 0.2863         | 0.0466         | 0.0378          | 0.0987        | 0.0505          | 0.0232         | 0.0968          | 0.0727               | -0.0986                  | 0.2722                    | 0.0679           | -0.0423          |
| ASV_74 (Bacteroides xylophilus)            | 0.5271          | -0.2325                 | -0.3058       | 0.0731         | 0.1906        | 0.1416          | -0.0578       | 0.0959        | -0.2272          | 0.3723            | 0.2438             | 0.2456         | -0.3065        | -0.3022         | 0.2096        | 0.0324          | 0.0198         | -0.2734         | 0.3896               | 0.0560                   | -0.3434                   | 0.4025           | -0.2558          |
| ASV_71 (Parabacteroides distans)           | -0.0996         | -0.0386                 | -0.1700       | 0.1314         | -0.1150       | -0.1355         | 0.0651        | 0.0764        | 0.0334           | 0.0058            | 0.1035             | -0.0608        | 0.0969         | -0.3023         | -0.0370       | 0.0189          | 0.2208         | -0.0304         | 0.0411               | 0.0049                   | 0.0050                    | -0.0140          | -0.2064          |
| ASV_77 (ClostridiumVIII ramosum)           | 0.2156          | -0.1658                 | -0.0376       | 0.0334         | 0.2657        | 0.0628          | 0.1266        | 0.0209        | -0.1489          | 0.2184            | -0.0035            | 0.3101         | -0.0675        | 0.4369          | 0.3945        | 0.0897          | 0.3742         | -0.4090         | 0.3179               | 0.1106                   | -0.1830                   | 0.3348           | -0.0785          |
| ASV_77 (Klebsiella spp.)                   | -0.1147         | 0.0215                  | -0.1615       | -0.1200        | -0.3429       | -0.2992         | -0.0596       | 0.3486        | 0.2323           | -0.2132           | 0.0303             | 0.0607         | -0.2527        | -0.1399         | -0.3198       | 0.2522          | 0.0666         | 0.4102          | -0.3329              | -0.3956                  | 0.0442                    | -0.2308          | -0.0697          |
| ASV_8 (Bacteroides fragilis)               | 0.1814          | -0.1761                 | -0.1474       | -0.0426        | 0.0207        | 0.0624          | 0.3658        | 0.1420        | 0.3841           | 0.2957            | 0.0622             | 0.2110         | -0.0569        | -0.1483         | -0.1554       | 0.2907          | -0.1633        | -0.1639         | 0.2973               | 0.2270                   | -0.2169                   | 0.1946           | -0.0844          |
| ASV_98 (Bacteroides spp.)                  | 0.3916          | -0.2316                 | 0.0014        | 0.0807         | 0.0223        | 0.0264          | -0.0953       | 0.0424        | -0.1816          | 0.2880            | 0.3972             | 0.2636         | -0.2428        | 0.0762          | 0.1211        | -0.0522         | 0.0403         | -0.1338         | 0.3256               | -0.0056                  | -0.2351                   | 0.2831           | -0.2136          |

<sup>a</sup>One sample excluded due to maternal antibiotics during sampling  
<sup>b</sup>Only ASVs with average relative abundance >0.2% and prevalence >15% across all samples were included  
<sup>c</sup>P-values below 0.05 are highlighted  
<sup>d</sup>FDR corrected P-values below 0.1 are highlighted

| HMO category                           | Weighted Unifrac |              | Unweighted Unifrac |              | Bray Curtis    |              | Jaccard        |              |
|----------------------------------------|------------------|--------------|--------------------|--------------|----------------|--------------|----------------|--------------|
|                                        | R <sup>2</sup>   | P-value      | R <sup>2</sup>     | P-value      | R <sup>2</sup> | P-value      | R <sup>2</sup> | P-value      |
| 2'FL/3FL (n=30)                        | 0.1542           | <b>0.011</b> | 0.0702             | <b>0.006</b> | 0.1166         | <b>0.003</b> | 0.0537         | <b>0.004</b> |
| LNT/LNnT (n=30)                        | 0.0447           | 0.272        | 0.0944             | <b>0.001</b> | 0.0784         | <b>0.018</b> | 0.0703         | <b>0.001</b> |
| 3'SL/6'SL (n=30)                       | 0.0095           | 0.834        | 0.0701             | <b>0.008</b> | 0.0284         | 0.561        | 0.0541         | <b>0.001</b> |
| 2'FL/3FL non-secretors excluded (n=25) | 0.1798           | <b>0.017</b> | 0.0875             | <b>0.002</b> | 0.1258         | <b>0.007</b> | 0.0619         | <b>0.004</b> |

| Table S12 - Correlations between relative abundances of HMOs in feces and relative abundance of genus level taxa in infant feces at age 5 months |                         |                  |                 |                      |                  |                 |                                    |                  |                 |                          |                      |                                    |
|--------------------------------------------------------------------------------------------------------------------------------------------------|-------------------------|------------------|-----------------|----------------------|------------------|-----------------|------------------------------------|------------------|-----------------|--------------------------|----------------------|------------------------------------|
| Genus <sup>1</sup>                                                                                                                               | Correlation coefficient |                  |                 | P-value <sup>2</sup> |                  |                 | FDR corrected P-value <sup>3</sup> |                  |                 | Correlations coefficient | P-value <sup>2</sup> | FDR corrected P-value <sup>3</sup> |
|                                                                                                                                                  | 2'FL/3FL (n=30)         | 3'SL/6'SL (n=30) | LNT/LNnT (n=30) | 2'FL/3FL (n=30)      | 3'SL/6'SL (n=30) | LNT/LNnT (n=30) | 2'FL/3FL (n=30)                    | 3'SL/6'SL (n=30) | LNT/LNnT (n=30) |                          |                      |                                    |
| <i>Bifidobacterium</i>                                                                                                                           | -0.452                  | 0.053            | -0.196          | 0.012                | 0.781            | 0.299           | 0.098                              | 0.892            | 0.435           | -0.494                   | 0.0121               | 0.0968                             |
| <i>Bacteroides</i>                                                                                                                               | 0.049                   | -0.111           | -0.173          | 0.795                | 0.558            | 0.360           | 0.884                              | 0.811            | 0.480           | 0.051                    | 0.8102               | 0.9259                             |
| <i>Enterococcus</i>                                                                                                                              | -0.211                  | -0.153           | 0.035           | 0.262                | 0.420            | 0.855           | 0.524                              | 0.719            | 0.912           | -0.052                   | 0.8038               | 0.9259                             |
| <i>Parabacteroides</i>                                                                                                                           | -0.225                  | -0.378           | -0.414          | 0.233                | 0.039            | 0.023           | 0.524                              | 0.157            | 0.122           | -0.311                   | 0.1305               | 0.3680                             |
| <i>Klebsiella</i>                                                                                                                                | 0.215                   | 0.555            | 0.276           | 0.254                | 0.001            | 0.140           | 0.524                              | 0.012            | 0.287           | 0.059                    | 0.7790               | 0.9259                             |
| <i>Veillonella</i>                                                                                                                               | 0.041                   | 0.161            | 0.147           | 0.829                | 0.396            | 0.437           | 0.884                              | 0.719            | 0.538           | 0.030                    | 0.8867               | 0.9458                             |
| <i>Streptococcus</i>                                                                                                                             | 0.287                   | 0.585            | 0.576           | 0.124                | 0.001            | 0.001           | 0.397                              | 0.011            | 0.014           | 0.161                    | 0.4427               | 0.7870                             |
| <i>Collinsella</i>                                                                                                                               | -0.456                  | -0.408           | -0.492          | 0.011                | 0.025            | 0.006           | 0.098                              | 0.135            | 0.046           | -0.590                   | 0.0019               | 0.0304                             |
| <i>Clostridiaceae_uncl</i>                                                                                                                       | 0.149                   | 0.007            | 0.208           | 0.431                | 0.971            | 0.269           | 0.690                              | 0.971            | 0.431           | 0.210                    | 0.3145               | 0.7189                             |
| <i>Lactobacillus</i>                                                                                                                             | -0.383                  | -0.316           | -0.384          | 0.037                | 0.089            | 0.036           | 0.196                              | 0.284            | 0.145           | -0.430                   | 0.0319               | 0.1701                             |
| <i>Blautia</i>                                                                                                                                   | -0.014                  | -0.037           | -0.223          | 0.941                | 0.847            | 0.236           | 0.941                              | 0.904            | 0.420           | -0.181                   | 0.3873               | 0.7746                             |
| <i>Clostridium_XVIII</i>                                                                                                                         | 0.052                   | -0.144           | -0.037          | 0.784                | 0.449            | 0.846           | 0.884                              | 0.719            | 0.912           | -0.097                   | 0.6432               | 0.9259                             |
| <i>Lachnospiraceae_uncl</i>                                                                                                                      | -0.187                  | -0.248           | -0.367          | 0.322                | 0.187            | 0.046           | 0.572                              | 0.499            | 0.148           | -0.305                   | 0.1380               | 0.3680                             |
| <i>Escherichia</i>                                                                                                                               | -0.294                  | -0.083           | -0.274          | 0.115                | 0.663            | 0.143           | 0.397                              | 0.884            | 0.287           | -0.308                   | 0.1342               | 0.3680                             |
| <i>Clostridium</i>                                                                                                                               | -0.053                  | -0.059           | -0.002          | 0.779                | 0.756            | 0.990           | 0.884                              | 0.892            | 0.990           | -0.013                   | 0.9514               | 0.9514                             |
| <i>Anaerostipes</i>                                                                                                                              | -0.090                  | -0.156           | -0.280          | 0.635                | 0.411            | 0.134           | 0.884                              | 0.719            | 0.287           | -0.102                   | 0.6263               | 0.9259                             |

<sup>1</sup>Only taxa with average relative abundance > 0.2% across all samples were included

<sup>2</sup>P-values below 0.05 are highlighted

<sup>3</sup>FDR corrected P-values below 0.1 are highlighted

| Table S13 - Correlations between HMOs in feces and relative abundance of ASV level taxa in infant feces at age 5 months |                         |                  |                 |                      |                  |                 |                                    |                  |                 |                                                 |                      |                                    |
|-------------------------------------------------------------------------------------------------------------------------|-------------------------|------------------|-----------------|----------------------|------------------|-----------------|------------------------------------|------------------|-----------------|-------------------------------------------------|----------------------|------------------------------------|
| ASV (Assigned taxonomy) <sup>1</sup>                                                                                    | Correlation coefficient |                  |                 | P-value <sup>2</sup> |                  |                 | FDR corrected P-value <sup>3</sup> |                  |                 | Correlations coefficient                        | P-value <sup>2</sup> | FDR corrected P-value <sup>3</sup> |
|                                                                                                                         | 2'FL/3FL (n=30)         | 3'SL/6'SL (n=30) | LNT/LNnT (n=30) | 2'FL/3FL (n=30)      | 3'SL/6'SL (n=30) | LNT/LNnT (n=30) | 2'FL/3FL (n=30)                    | 3'SL/6'SL (n=30) | LNT/LNnT (n=30) | 2'FL/3FL when non-secretors are excluded (n=25) |                      |                                    |
| ASV_40 ( <i>Bifidobacterium</i> spp.)                                                                                   | 0.026                   | -0.078           | 0.045           | 0.8898               | 0.6808           | 0.8145          | 0.9430                             | 0.8340           | 0.8737          | -0.096                                          | 0.6464               | 0.7753                             |
| ASV_37 ( <i>Bifidobacterium catenulatum</i> group)                                                                      | 0.021                   | 0.023            | -0.306          | 0.9135               | 0.9035           | 0.0997          | 0.9430                             | 0.9871           | 0.2959          | 0.005                                           | 0.9813               | 0.9813                             |
| ASV_18 ( <i>Bifidobacterium bifidum</i> )                                                                               | -0.450                  | -0.366           | -0.403          | 0.0125               | 0.0469           | 0.0272          | 0.0829                             | 0.1500           | 0.1223          | -0.442                                          | 0.0268               | 0.1715                             |
| ASV_17 ( <i>Bifidobacterium breve</i> )                                                                                 | 0.096                   | 0.112            | 0.022           | 0.6125               | 0.5572           | 0.9082          | 0.7539                             | 0.7753           | 0.9082          | -0.053                                          | 0.8013               | 0.8842                             |
| ASV_108 ( <i>Bifidobacterium</i> spp.)                                                                                  | -0.230                  | -0.304           | -0.162          | 0.2211               | 0.1030           | 0.3937          | 0.5443                             | 0.2745           | 0.6300          | -0.254                                          | 0.2199               | 0.5425                             |
| ASV_1 ( <i>Bifidobacterium longum</i> )                                                                                 | -0.471                  | -0.087           | -0.365          | 0.0086               | 0.6463           | 0.0476          | 0.0829                             | 0.8273           | 0.1694          | -0.505                                          | 0.0101               | 0.1008                             |
| ASV_7 ( <i>Bifidobacterium longum</i> )                                                                                 | -0.294                  | -0.246           | -0.085          | 0.1152               | 0.1904           | 0.6546          | 0.3552                             | 0.4061           | 0.8293          | -0.310                                          | 0.1314               | 0.5256                             |
| ASV_26 ( <i>Collinsella aerofaciens</i> )                                                                               | -0.456                  | -0.408           | -0.492          | 0.0113               | 0.0252           | 0.0057          | 0.0829                             | 0.1154           | 0.0608          | -0.590                                          | 0.0019               | 0.0608                             |
| ASV_98 ( <i>Bacteroides</i> spp.)                                                                                       | 0.126                   | -0.090           | 0.060           | 0.5079               | 0.6359           | 0.7547          | 0.7066                             | 0.8273           | 0.8625          | 0.298                                           | 0.1483               | 0.5273                             |
| ASV_35 ( <i>Bacteroides</i> spp.)                                                                                       | -0.145                  | -0.376           | -0.290          | 0.4431               | 0.0407           | 0.1195          | 0.6977                             | 0.1500           | 0.3186          | -0.132                                          | 0.5289               | 0.7753                             |
| ASV_15 ( <i>Bacteroides vulgatus</i> )                                                                                  | -0.190                  | 0.021            | -0.068          | 0.3136               | 0.9125           | 0.7226          | 0.6272                             | 0.9871           | 0.8564          | -0.254                                          | 0.2204               | 0.5425                             |
| ASV_59 ( <i>Bacteroides</i> spp.)                                                                                       | -0.178                  | -0.254           | -0.399          | 0.3459               | 0.1749           | 0.0289          | 0.6511                             | 0.3999           | 0.1223          | -0.199                                          | 0.3408               | 0.6059                             |
| ASV_86 ( <i>Bacteroides fragilis</i> )                                                                                  | -0.152                  | 0.003            | -0.088          | 0.4212               | 0.9871           | 0.6436          | 0.6977                             | 0.9871           | 0.8293          | 0.208                                           | 0.3174               | 0.5975                             |
| ASV_61 ( <i>Bacteroides thetaiotaomicron</i> )                                                                          | -0.501                  | -0.466           | -0.305          | 0.0048               | 0.0095           | 0.1017          | 0.0829                             | 0.0543           | 0.2959          | -0.492                                          | 0.0126               | 0.1008                             |
| ASV_70 ( <i>Bacteroides xylanisolvens</i> )                                                                             | -0.083                  | -0.264           | -0.146          | 0.6612               | 0.1587           | 0.4409          | 0.7743                             | 0.3905           | 0.6718          | -0.007                                          | 0.9750               | 0.9813                             |
| ASV_71 ( <i>Parabacteroides distasonis</i> )                                                                            | 0.013                   | -0.185           | -0.204          | 0.9470               | 0.3286           | 0.2799          | 0.9470                             | 0.6185           | 0.5454          | -0.142                                          | 0.4979               | 0.7753                             |
| ASV_39 ( <i>Enterococcus faecalis</i> )                                                                                 | -0.369                  | -0.175           | -0.200          | 0.0450               | 0.3554           | 0.2897          | 0.2057                             | 0.6319           | 0.5454          | -0.232                                          | 0.2644               | 0.5641                             |
| ASV_36 ( <i>Enterococcus faecium</i> group)                                                                             | -0.137                  | -0.113           | 0.080           | 0.4714               | 0.5511           | 0.6738          | 0.6977                             | 0.7753           | 0.8293          | -0.087                                          | 0.6784               | 0.7753                             |
| ASV_46 ( <i>Lactobacillus casei</i> group)                                                                              | -0.448                  | -0.372           | -0.440          | 0.0130               | 0.0427           | 0.0150          | 0.0829                             | 0.1500           | 0.1015          | -0.506                                          | 0.0098               | 0.1008                             |
| ASV_12 ( <i>Streptococcus</i> spp.)                                                                                     | 0.215                   | 0.462            | 0.395           | 0.2548               | 0.0102           | 0.0306          | 0.5824                             | 0.0543           | 0.1223          | 0.093                                           | 0.6579               | 0.7753                             |
| ASV_2 ( <i>Streptococcus mitis</i> group)                                                                               | 0.373                   | 0.689            | 0.670           | 0.0422               | 0.0000           | 0.0001          | 0.2057                             | 0.0008           | 0.0016          | 0.269                                           | 0.1935               | 0.5425                             |
| ASV_6 ( <i>Streptococcus salivarius</i> )                                                                               | 0.288                   | 0.519            | 0.588           | 0.1221               | 0.0033           | 0.0006          | 0.3552                             | 0.0264           | 0.0102          | 0.233                                           | 0.2625               | 0.5641                             |
| ASV_50 ( <i>Clostridiaceae</i> spp.)                                                                                    | 0.143                   | -0.015           | 0.241           | 0.4509               | 0.9386           | 0.1987          | 0.6977                             | 0.9871           | 0.4542          | 0.211                                           | 0.3111               | 0.5975                             |
| ASV_186 ( <i>Clostridium perfringens</i> )                                                                              | -0.103                  | 0.005            | 0.105           | 0.5875               | 0.9773           | 0.5802          | 0.7520                             | 0.9871           | 0.8072          | -0.175                                          | 0.4041               | 0.6806                             |
| ASV_34 ( <i>Ruminococcus gnavus</i> )                                                                                   | -0.203                  | -0.334           | -0.437          | 0.2831               | 0.0710           | 0.0159          | 0.6040                             | 0.2066           | 0.1015          | -0.323                                          | 0.1153               | 0.5256                             |
| ASV_73 ( <i>ClostridiumXVIII ramosum</i> )                                                                              | 0.052                   | -0.144           | -0.037          | 0.7841               | 0.4491           | 0.8464          | 0.8652                             | 0.7564           | 0.8737          | -0.097                                          | 0.6432               | 0.7753                             |
| ASV_21 ( <i>Veillonella</i> spp.)                                                                                       | 0.111                   | 0.133            | 0.043           | 0.5601               | 0.4827           | 0.8219          | 0.7468                             | 0.7724           | 0.8737          | 0.105                                           | 0.6174               | 0.7753                             |
| ASV_11 ( <i>Veillonella dispar</i> )                                                                                    | 0.134                   | 0.072            | 0.181           | 0.4797               | 0.7037           | 0.3392          | 0.6977                             | 0.8340           | 0.5712          | 0.098                                           | 0.6427               | 0.7753                             |
| ASV_42 ( <i>Veillonella atypica</i> )                                                                                   | 0.079                   | 0.229            | 0.127           | 0.6775               | 0.2231           | 0.5048          | 0.7743                             | 0.4461           | 0.7342          | -0.042                                          | 0.8421               | 0.8982                             |
| ASV_13 ( <i>Escherichia/Shigella</i> spp.)                                                                              | -0.322                  | -0.123           | -0.282          | 0.0828               | 0.5178           | 0.1316          | 0.3209                             | 0.7753           | 0.3239          | -0.317                                          | 0.1224               | 0.5256                             |
| ASV_77 ( <i>Klebsiella</i> spp.)                                                                                        | 0.236                   | 0.528            | 0.213           | 0.2093               | 0.0027           | 0.2586          | 0.5443                             | 0.0264           | 0.5454          | 0.096                                           | 0.6492               | 0.7753                             |
| ASV_63 ( <i>Klebsiella</i> spp.)                                                                                        | 0.315                   | 0.531            | 0.184           | 0.0902               | 0.0025           | 0.3306          | 0.3209                             | 0.0264           | 0.5712          | 0.257                                           | 0.2156               | 0.5425                             |

<sup>1</sup>Only ASVs with average relative abundance >0.2% and prevalence >15% across all samples were included  
<sup>2</sup>P-values below 0.05 are highlighted  
<sup>3</sup>FDR corrected P-values below 0.1 are highlighted
