# Supplementary material for: Maternal milk microbiota and oligosaccharides contribute to the infant gut microbiota assembly
Source: PubMed Central journal article supplement (PMC9723702; doi:10.1038/s43705-021-00021-3), 2021-06-07
Supplement: 43705_2021_21_MOESM3_ESM.pdf [file 43705_2021_21_MOESM3_ESM.pdf]

**Supplementary File 1: Experimental conditions for the full scan MS mode on UPLC-qTOF-MS (SYNAPT, Waters, Manchester,**

| Mobile Phases     | Five $\mu\text{L}$ of each sample were injected into the gradient mobile phase A (0.1 % formic acid in Milli-Q water), mobile phase B (0.1 % formic acid in ACN:MeOH (70:30, v/v)). Overview of the 7 min gradient is presented below.                                                                                                                                                                                                                                                                                                                                                                                                                                                                                                                   |                                       |                    |                    |         |
|-------------------|----------------------------------------------------------------------------------------------------------------------------------------------------------------------------------------------------------------------------------------------------------------------------------------------------------------------------------------------------------------------------------------------------------------------------------------------------------------------------------------------------------------------------------------------------------------------------------------------------------------------------------------------------------------------------------------------------------------------------------------------------------|---------------------------------------|--------------------|--------------------|---------|
|                   | Time (min)                                                                                                                                                                                                                                                                                                                                                                                                                                                                                                                                                                                                                                                                                                                                               | Flow Rate<br>( $\text{mL min}^{-1}$ ) | Mobile phase A (%) | Mobile phase B (%) | Curve   |
|                   | 0                                                                                                                                                                                                                                                                                                                                                                                                                                                                                                                                                                                                                                                                                                                                                        | 0.5                                   | 100                | 0                  | Initial |
|                   | 1                                                                                                                                                                                                                                                                                                                                                                                                                                                                                                                                                                                                                                                                                                                                                        | 0.5                                   | 92                 | 8                  | 11      |
|                   | 2                                                                                                                                                                                                                                                                                                                                                                                                                                                                                                                                                                                                                                                                                                                                                        | 0.6                                   | 85                 | 15                 | 10      |
|                   | 3                                                                                                                                                                                                                                                                                                                                                                                                                                                                                                                                                                                                                                                                                                                                                        | 0.7                                   | 60                 | 40                 | 10      |
|                   | 4                                                                                                                                                                                                                                                                                                                                                                                                                                                                                                                                                                                                                                                                                                                                                        | 0.8                                   | 30                 | 70                 | 6       |
|                   | 4.5                                                                                                                                                                                                                                                                                                                                                                                                                                                                                                                                                                                                                                                                                                                                                      | 1                                     | 0                  | 100                | 6       |
|                   | 5                                                                                                                                                                                                                                                                                                                                                                                                                                                                                                                                                                                                                                                                                                                                                        | 1.2                                   | 0                  | 100                | 1       |
|                   | 6.4                                                                                                                                                                                                                                                                                                                                                                                                                                                                                                                                                                                                                                                                                                                                                      | 1.1                                   | 0                  | 100                | 1       |
|                   | 6.6                                                                                                                                                                                                                                                                                                                                                                                                                                                                                                                                                                                                                                                                                                                                                      | 1                                     | 95                 | 5                  | 1       |
|                   | 6.8                                                                                                                                                                                                                                                                                                                                                                                                                                                                                                                                                                                                                                                                                                                                                      | 0.5                                   | 95                 | 5                  | 6       |
| 7                 | 0.5                                                                                                                                                                                                                                                                                                                                                                                                                                                                                                                                                                                                                                                                                                                                                      | 95                                    | 5                  | 6                  |         |
| Mass Spectrometry | The electrospray ionization was operated in both positive mode with 3.2 capillary probe voltages, respectively. The cone voltage and the collision energy were set at 25 kV and 6 eV. The ion source and desolvation gas (nitrogen) temperature were 120 and 400 °C while the sampling cone and desolvation gas flow rates were 50 and 1000 l/hr. The scan time was set at 0.08 s with 0.02 s interscan delay for both modes. Data were acquired in centroid mode with a mass range from 50 to 1000 Da. Leucine-enkephalin (500 ng/ml) was infused as a lock-spray agent to calibrate the mass accuracy every 10s with 0.4s scan time. Data acquisition and visualization were performed in MassLynx V4.1 software (Waters Corporation, Manchester, UK). |                                       |                    |                    |         |

**Supplementary File 2: Optimized parameters used for pre-processing the data in mzMine2.28**

| Batch step                |                                                                                                           | Parameters                                                                                                                                                                                                 |
|---------------------------|-----------------------------------------------------------------------------------------------------------|------------------------------------------------------------------------------------------------------------------------------------------------------------------------------------------------------------|
| <b>Positive mode</b>      | Raw data import                                                                                           | None                                                                                                                                                                                                       |
|                           | Mass detection                                                                                            | Noise level: 2.0E1                                                                                                                                                                                         |
|                           | Chromatogram builder                                                                                      | Min time span (min): 0.02                                                                                                                                                                                  |
|                           |                                                                                                           | Min height:5.0E1 ; m/z tolerance: 0.04 Da or 20 ppm                                                                                                                                                        |
|                           | Smoothing                                                                                                 | Filter width: 7                                                                                                                                                                                            |
|                           | Chromatogram deconvolution                                                                                | Chromatographic threshold: 95%; Search minimum in RT range (min): 0.01; Minimum relative height: 5%; Minimum absolute height: 6.0E1; Min. ratio of peak/top edge: 1.6; Peak duration range (min): 0.01-0.4 |
|                           | Isotopic pattern                                                                                          | m/z tolerance: 0.06 Da or 30 ppm; Retention time tolerance: 0.02; Monotonic shape; maximum charge: 1                                                                                                       |
|                           | Join aligner                                                                                              | m/z tolerance: 0.04 Da or 20 ppm; Absolute retention time tolerance (min): 0.04; Weight for both m/z tolerance and retention time tolerance: 10                                                            |
|                           | Peak list rows filter                                                                                     | Min peaks in a row: 5 and 0 (for samples and blanks respectively)<br>Minimum peaks in an isotope pattern: 1; m/z range: 50-1000; RT range: 0-7; peak duration range: 0.01-0.4 min                          |
| Peak finder (gap filling) | Intensity tolerance: 50%; m/z tolerance: 0.02 Da or 15 ppm; Absolute retention time tolerance (min): 0.03 |                                                                                                                                                                                                            |

Supplementary File 3: Mass spectra of HMO standards

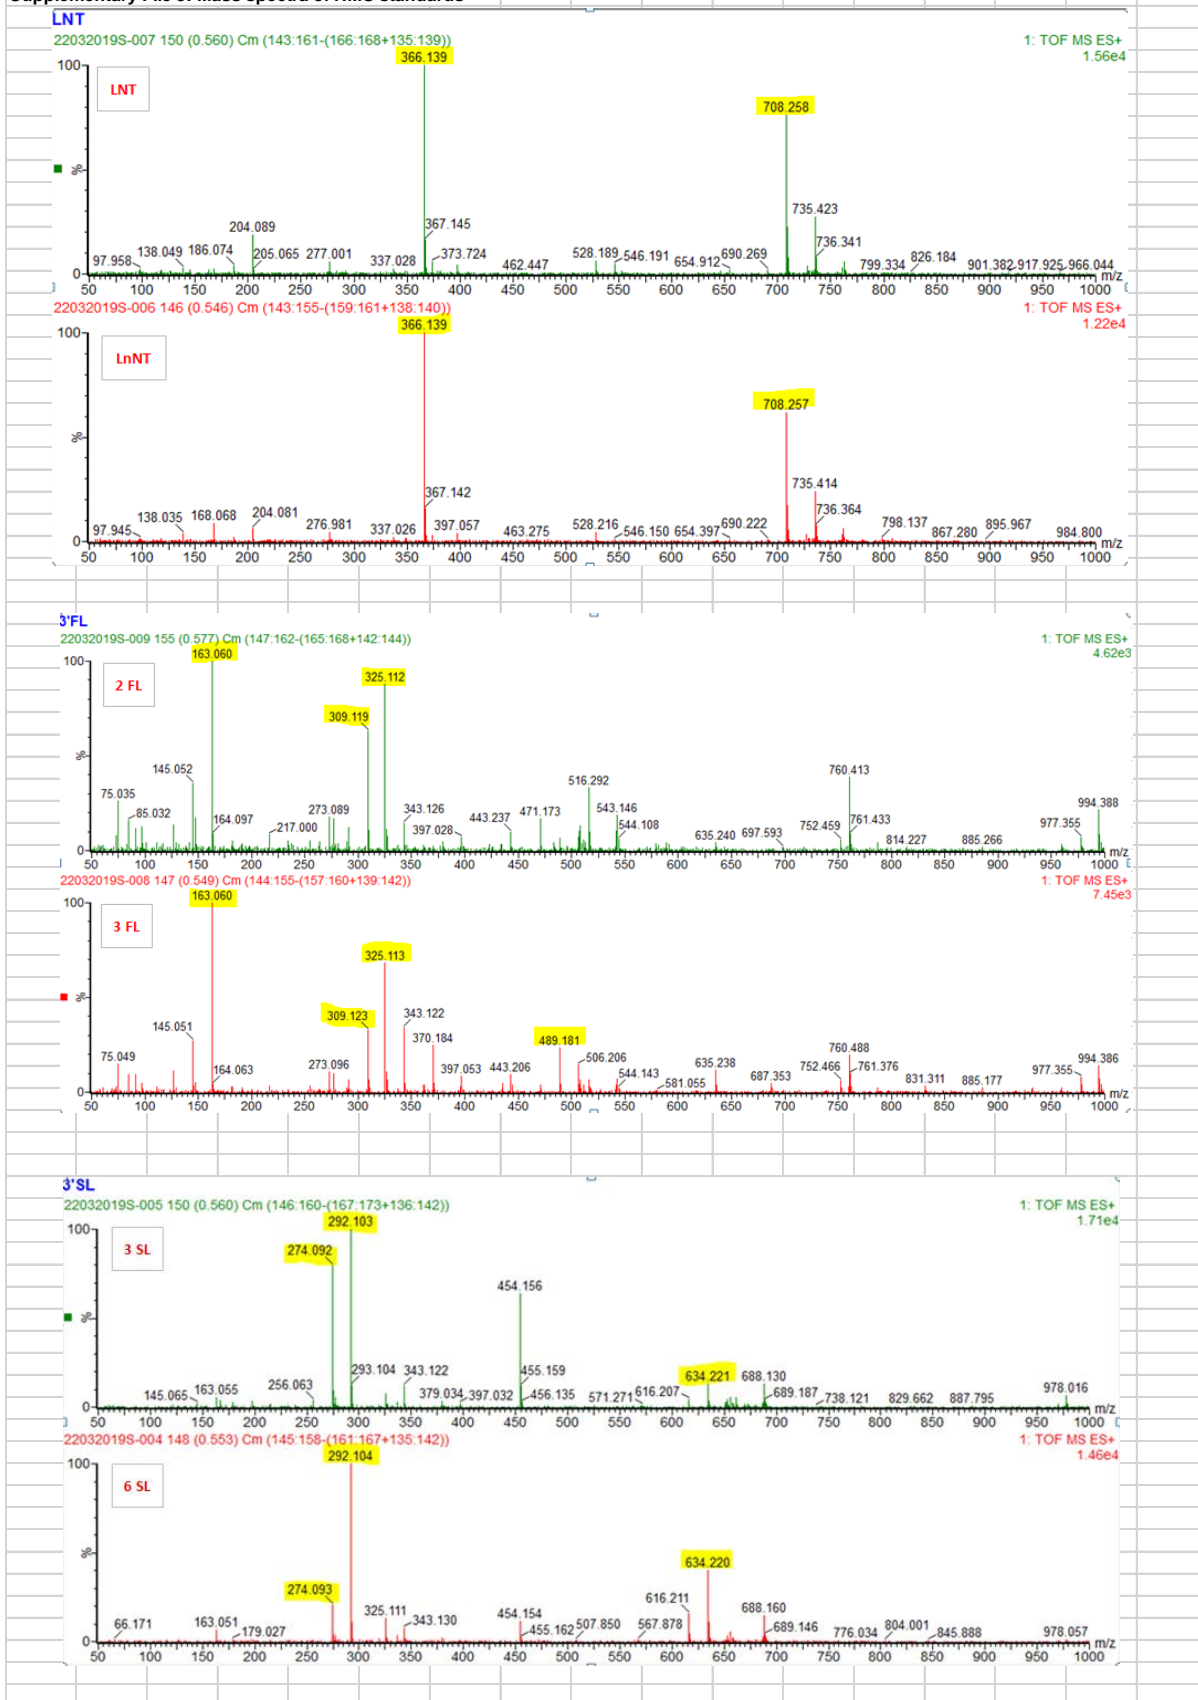

Supplementary File 4: Chromatograms for the major fragment of HMOs in the authentic standards and in infant stool samples

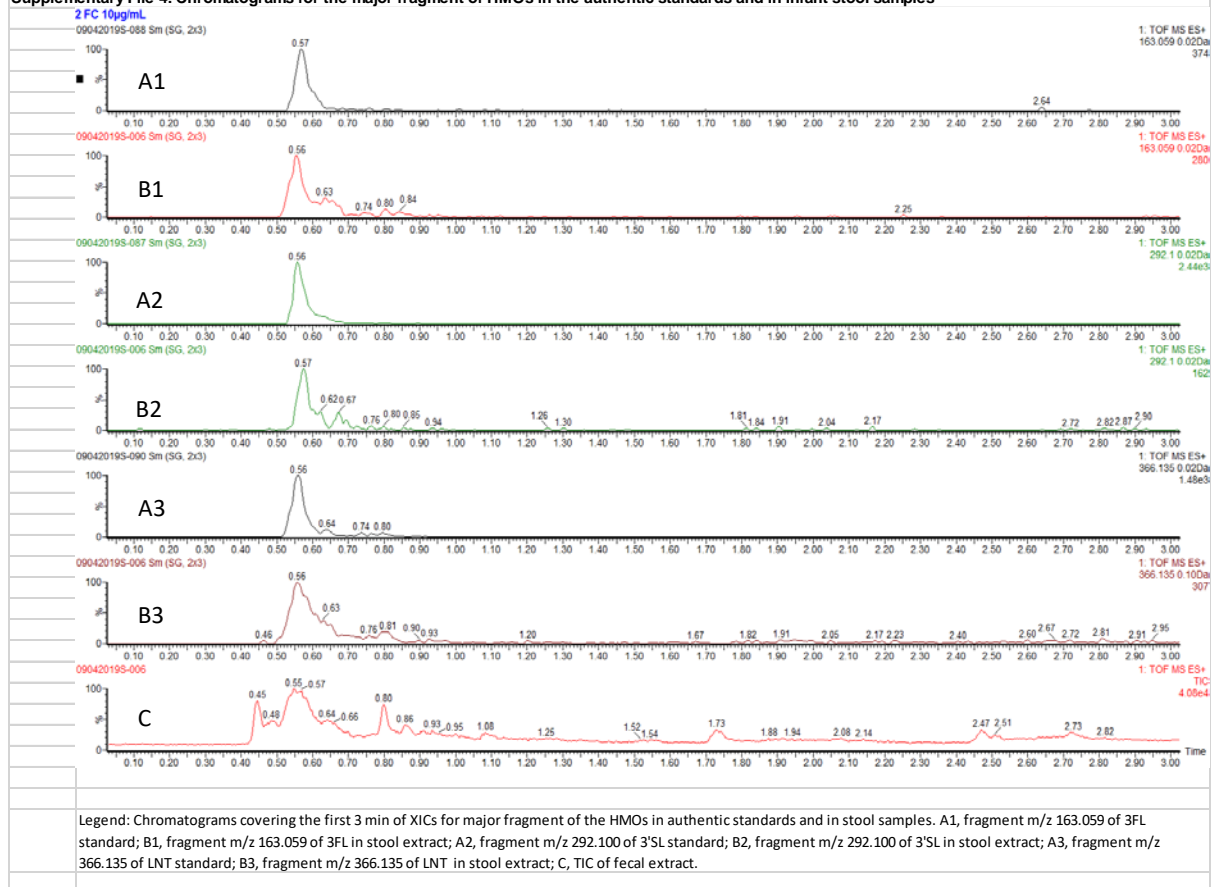

| Supplementary File 5: Relative abundances (peak intensities) of the HMO residuals in infant stool samples at age 5 months |                            |                  |                  |                  |                  |                  |                             |                   |
|---------------------------------------------------------------------------------------------------------------------------|----------------------------|------------------|------------------|------------------|------------------|------------------|-----------------------------|-------------------|
| Retention Time (min)                                                                                                      | 0.56                       | 0.56             | 0.56             | 0.55             | 0.57             | 0.57             | 0.56                        | 0.56              |
| Mass to charge ratio (m/z)                                                                                                | 489.182                    | 325.1119         | 163.0592*        | 309.1199         | 292.1029*        | 274.0917         | 708.2556                    | 366.1352*         |
| Subject ID                                                                                                                | 2FL/3FL [M+H] <sup>+</sup> | 2FL/3FL fragment | 2FL/3FL fragment | 2FL/3FL fragment | 3SL/6SL fragment | 3SL/6SL fragment | LNT/LnNT [M+H] <sup>+</sup> | LNT/LnNT fragment |
| 1                                                                                                                         | 39.0                       | 49.0             | 85.1             | 35.5             | 457.5            | 930.8            | 576.4                       | 967.6             |
| 2                                                                                                                         | 86.6                       | 63.7             | 339.2            | 37.2             | 932.0            | 2582.5           | 59.5                        | 240.0             |
| 3                                                                                                                         | 15.0                       | 98.6             | 220.7            | 20.0             | 504.5            | 1757.2           | 91.2                        | 378.1             |
| 4                                                                                                                         | 27.0                       | 40.5             | 131.4            | 20.0             | 511.1            | 1358.8           | 53.0                        | 459.0             |
| 5                                                                                                                         | 118.5                      | 467.1            | 802.1            | 135.8            | 588.0            | 1455.0           | 219.3                       | 805.5             |
| 6                                                                                                                         | 18.0                       | 70.0             | 85.9             | 25.0             | 156.2            | 282.3            | 38.7                        | 103.9             |
| 7                                                                                                                         | 16.0                       | 24.6             | 32.8             | 14.0             | 32.0             | 64.1             | 6.0                         | 26.9              |
| 8                                                                                                                         | 15.0                       | 23.0             | 42.9             | 11.7             | 58.4             | 76.0             | 10.7                        | 48.0              |
| 9                                                                                                                         | 135.3                      | 305.1            | 641.5            | 179.3            | 933.7            | 2641.3           | 1501.6                      | 3348.7            |
| 10                                                                                                                        | 58.0                       | 85.0             | 165.1            | 61.0             | 337.6            | 711.8            | 82.5                        | 625.4             |
| 11                                                                                                                        | 29.0                       | 47.1             | 81.3             | 33.0             | 514.4            | 1190.2           | 111.3                       | 950.9             |
| 12                                                                                                                        | 50.0                       | 34.2             | 72.7             | 42.2             | 428.8            | 1192.6           | 204.9                       | 1931.4            |
| 13                                                                                                                        | 64.3                       | 250.7            | 288.3            | 230.6            | 106.0            | 259.3            | 134.6                       | 973.1             |
| 14                                                                                                                        | 20.0                       | 59.9             | 117.3            | 32.0             | 329.9            | 704.7            | 64.7                        | 193.2             |
| 15                                                                                                                        | 26.0                       | 59.0             | 51.0             | 12.5             | 86.0             | 131.6            | 62.3                        | 196.0             |
| 16                                                                                                                        | NA                         | NA               | NA               | NA               | NA               | NA               | NA                          | NA                |
| 17                                                                                                                        | 11.0                       | 79.6             | 66.0             | 25.7             | 123.7            | 184.6            | 90.1                        | 90.8              |
| 18                                                                                                                        | 26.0                       | 35.0             | 49.8             | 16.8             | 109.2            | 299.1            | 53.8                        | 246.6             |
| 19                                                                                                                        | 9.0                        | 31.0             | 21.0             | 40.0             | 47.7             | 64.4             | 27.0                        | 62.3              |
| 20                                                                                                                        | 14.7                       | 43.0             | 61.2             | 36.2             | 67.4             | 158.9            | 169.0                       | 363.4             |
| 21                                                                                                                        | 11.0                       | 19.3             | 34.0             | 12.0             | 48.0             | 109.5            | 7.0                         | 57.7              |
| 22                                                                                                                        | 29.0                       | 66.0             | 161.7            | 22.6             | 857.4            | 2683.4           | 383.6                       | 843.1             |
| 23                                                                                                                        | 41.0                       | 155.8            | 299.0            | 65.1             | 1324.0           | 4817.7           | 540.4                       | 1790.1            |
| 24                                                                                                                        | 20.0                       | 105.9            | 153.2            | 79.0             | 510.6            | 1677.4           | 98.2                        | 229.6             |
| 25                                                                                                                        | 10.0                       | 27.0             | 29.5             | 17.0             | 23.0             | 38.0             | 0.0                         | 23.0              |
| 26                                                                                                                        | 504.6                      | 1222.0           | 1229.1           | 942.8            | 184.6            | 469.4            | 79.6                        | 620.4             |
| 27                                                                                                                        | 701.8                      | 1390.5           | 2205.6           | 683.7            | 377.8            | 765.3            | 1592.8                      | 2715.4            |
| 28                                                                                                                        | 24.0                       | 77.0             | 87.8             | 35.0             | 55.0             | 85.1             | 29.0                        | 133.7             |
| 29                                                                                                                        | 800.7                      | 1636.9           | 1478.9           | 827.3            | 97.3             | 166.7            | 85.9                        | 488.3             |
| 30                                                                                                                        | NA                         | NA               | NA               | NA               | NA               | NA               | NA                          | NA                |
| 31                                                                                                                        | 7.0                        | 25.0             | 28.0             | 11.0             | 80.1             | 160.0            | 19.0                        | 14.0              |
| 32                                                                                                                        | 11.0                       | 41.1             | 31.3             | 11.0             | 30.6             | 48.0             | 33.0                        | 53.0              |
| 33                                                                                                                        | 19.0                       | 50.0             | 27.3             | 24.0             | 92.5             | 126.9            | 69.9                        | 360.6             |
| 34                                                                                                                        | 10.3                       | 63.3             | 101.6            | 17.0             | 70.1             | 219.4            | 14.0                        | 45.7              |
| <b>* highest intensity fragment</b>                                                                                       |                            |                  |                  |                  |                  |                  |                             |                   |
|                                                                                                                           |                            |                  |                  |                  |                  |                  |                             |                   |
|                                                                                                                           |                            |                  |                  |                  |                  |                  |                             |                   |
